# Supplementary material for: Safety and Immunogenicity of Inactivated Whole Virion COVID-19 Vaccine CoviVac in Clinical Trials in 18–60 and 60+ Age Cohorts
Source: MDPI journal article supplement (doi:10.3390/v15091828), 2023-08-29
Supplement: s1 [file s1]

## SUPPLEMENTARY MATERIALS

**Supplementary Table S1.** Adverse events severity score

| Score        | Hyperemia/swelling/induration<br>at the injection site | Fever                                                                | Other                                       |
|--------------|--------------------------------------------------------|----------------------------------------------------------------------|---------------------------------------------|
| 0 – absent   | none                                                   | $\leq 37.0\text{ }^{\circ}\text{C}$                                  | none                                        |
| 1 – mild     | hyperemia <50 mm or<br>swelling/induration <25 mm      | $> 37.0\text{ }^{\circ}\text{C} - \leq 37.5\text{ }^{\circ}\text{C}$ | does not interfere<br>with daily activities |
| 2 – moderate | hyperemia >50 mm or<br>swelling/induration 26–50 mm    | $> 37.6\text{ }^{\circ}\text{C} - \leq 38.5\text{ }^{\circ}\text{C}$ | interferes<br>with daily activities         |
| 3 – severe   | swelling/induration >50 mm                             | $> 38.6\text{ }^{\circ}\text{C}$                                     | prevents daily activities                   |

**Supplementary Table S2.** Total adverse events observed in the Vaccine Group and in the Placebo Group within 28 days following each vaccination

| Adverse event                                                 | Vaccine                                                     |                            |                            | Placebo                                                     |                       |                       |
|---------------------------------------------------------------|-------------------------------------------------------------|----------------------------|----------------------------|-------------------------------------------------------------|-----------------------|-----------------------|
|                                                               | Number of participants with AEs (%; 95% CI) / number of AEs |                            |                            | Number of participants with AEs (%; 95% CI) / number of AEs |                       |                       |
|                                                               | Total participants<br>N=298                                 | Within 28 days after       |                            | Total participants<br>N=100                                 | Within 28 days after  |                       |
|                                                               |                                                             | First dose                 | Second dose                |                                                             | First dose            | Second dose           |
| <b>Local and systemic reactions</b>                           | 58 (19.5%, 15.4–24.3%) / 84                                 | 34 (11.4%, 8.3–15.5%) / 39 | 34 (11.4%, 8.3–15.5%) / 45 | 16 (16%, 10.1–24.4%) / 23                                   | 7 (7%, 3.4–13.7%) / 8 | 10 (10%) / 15         |
| Pain at the injection site                                    | 48 (16.1%, 12.4–20.7%) / 56                                 | 31 (10.4%, 7.4–14.4%) / 31 | 25 (8.4%, 5.7–12.1%) / 25  | 11 (11%, 6.3–18.6%) / 12                                    | 5 (5%, 2.2–11.2%) / 5 | 7 (7%, 3.4–13.7%) / 7 |
| Induration at the injection site                              | 3 (1%, 0.3–2.9%) / 3                                        | 1 (0.3%, 0.1–1.9%) / 1     | 2 (0.7%, 0.2–2.4%) / 2     | 3 (3%, 1.0–8.5%) / 3                                        | –                     | 3 (3%, 1.0–8.5%) / 3  |
| Hematoma at the injection site                                | –                                                           | –                          | –                          | 1 (1%, 0.2–5.4%) / 1                                        | 1 (1%, 0.2–5.4%) / 1  | –                     |
| Swelling at the injection site                                | –                                                           | –                          | –                          | 1 (1%, 0.2–5.4%) / 1                                        | –                     | 1 (1%, 0.2–5.4%) / 1  |
| Itching at the injection site                                 | –                                                           | –                          | –                          | 1 (1%, 0.2–5.4%) / 1                                        | –                     | 1 (1%, 0.2–5.4%) / 1  |
| Fever                                                         | 13 (4.4%, 2.7–7.3%) / 14                                    | 6 (2%, 0.9–4.3%) / 6       | 7 (2.3%, 1.1–4.8%) / 8     | 2 (2%, 0.6–7.0%) / 2                                        | 2 (2%, 0.6–7.0%) / 2  | –                     |
| Malaise                                                       | 5 (1.7%, 0.7–3.9%) / 11                                     | 1 (0.3%, 0.1–1.9%) / 1     | 4 (1.3%, 0.5–3.4%) / 10    | 2 (2%, 0.6–7.0%) / 3                                        | –                     | 2 (2%, 0.6–7.0%) / 3  |
| <b>Laboratory methods</b>                                     | 22 (7.4%, 4.9–10.9%) / 25                                   | 8 (2.7%, 1.4–5.2%) / 8     | 14 (4.7%, 2.8–7.7%) / 17   | 7 (7%, 3.4–13.7%) / 7                                       | 2 (2%, 0.6–7.0%) / 2  | 5 (5%, 2.2–11.2%) / 5 |
| Increased leukocytes content                                  | 1 (0.3%, 0.1–1.9%) / 1                                      | 1 (0.3%, 0.1–1.9%) / 1     | –                          | –                                                           | –                     | –                     |
| Positive SARS-CoV-2 PCR test                                  | 18 (6%, 3.9–9.3%) / 18                                      | 7 (2.3%, 1.1–4.8%) / 7     | 11 (3.7%, 2.1–6.5%) / 11   | 6 (6%, 2.8–12.5%) / 6                                       | 2 (2%, 0.6–7.0%) / 2  | 4 (4%, 1.6–9.8%) / 4  |
| Increased creatine phosphokinase level                        | 3 (1%, 0.3–2.9%) / 3                                        | –                          | 3 (1%, 0.3–2.9%) / 3       | 1 (1%, 0.2–5.4%) / 1                                        | –                     | 1 (1%, 0.2–5.4%) / 1  |
| Increased ALT level                                           | 1 (0.3%, 0.1–1.9%) / 1                                      | –                          | 1 (0.3%, 0.1–1.9%) / 1     | –                                                           | –                     | –                     |
| Increased AST level                                           | 1 (0.3%, 0.1–1.9%) / 1                                      | –                          | 1 (0.3%, 0.1–1.9%) / 1     | –                                                           | –                     | –                     |
| Increased CRP level                                           | 1 (0.3%, 0.1–1.9%) / 1                                      | –                          | 1 (0.3%, 0.1–1.9%) / 1     | –                                                           | –                     | –                     |
| <b>Blood and lymphatic system disorders</b>                   | 1 (0.3%, 0.1–1.9%) / 1                                      | 1 (0.3%, 0.1–1.9%) / 1     | –                          | –                                                           | –                     | –                     |
| Inguinal lymphadenitis                                        | 1 (0.3%, 0.1–1.9%) / 1                                      | 1 (0.3%, 0.1–1.9%) / 1     | –                          | –                                                           | –                     | –                     |
| <b>Blood vessel disorders</b>                                 | –                                                           | –                          | –                          | 1 (1%, 0.2–5.4%) / 1                                        | 1 (1%, 0.2–5.4%) / 1  | –                     |
| Deep venous leg thrombosis                                    | –                                                           | –                          | –                          | 1 (1%, 0.2–5.4%) / 1                                        | 1 (1%, 0.2–5.4%) / 1  | –                     |
| <b>Infections and parasitic invasions</b>                     | 29 (9.7%, 6.9–13.6%) / 29                                   | 18 (6%, 3.9–9.3%) / 18     | 11 (3.7%, 2.1–6.5%) / 11   | 4 (4%, 1.6–9.8%) / 4                                        | 2 (2%, 0.6–7.0%) / 2  | 2 (2%, 0.6–7.0%) / 2  |
| SARS-CoV-2 infection                                          | 25 (8.4%, 5.7–12.1%) / 25                                   | 16 (5.4%, 3.3–8.5%) / 16   | 9 (3%, 1.6–5.6%) / 9       | 4 (4%, 1.6–9.8%) / 4                                        | 2 (2%, 0.6–7.0%) / 2  | 2 (2%, 0.6–7.0%) / 2  |
| Other upper respiratory tract infections                      | 3 (1%, 0.3–2.9%) / 3                                        | 2 (0.7%, 0.2–2.4%) / 2     | 1 (0.3%, 0.1–1.9%) / 1     | –                                                           | –                     | –                     |
| Candidiasis                                                   | 1 (0.3%, 0.1–1.9%) / 1                                      | –                          | 1 (0.3%, 0.1–1.9%) / 1     | –                                                           | –                     | –                     |
| <b>Nervous system disorders</b>                               | 11 (3.7%, 2.1–6.5%) / 20                                    | 4 (1.3%, 0.5–3.4%) / 4     | 9 (3%, 1.6–5.6%) / 16      | 6 (6%, 2.8–12.5%) / 12                                      | 3 (3%, 1.0–8.5%) / 3  | 3 (3%, 1.0–8.5%) / 9  |
| Headache                                                      | 11 (3.7%, 2.1–6.5%) / 19                                    | 4 (1.3%, 0.5–3.4%) / 4     | 8 (2.7%, 1.4–5.2%) / 15    | 6 (6%, 2.8–12.5%) / 12                                      | 3 (3%, 1.0–8.5%) / 3  | 3 (3%, 1.0–8.5%) / 9  |
| Dizziness                                                     | 1 (0.3%, 0.1–1.9%) / 1                                      | –                          | 1 (0.3%, 0.1–1.9%) / 1     | –                                                           | –                     | –                     |
| <b>Musculoskeletal and connective tissue disorders</b>        | 5 (1.7%, 0.7–3.9%) / 8                                      | 2 (0.7%, 0.2–2.4%) / 3     | 3 (1%, 0.3–2.9%) / 5       | 1 (1%, 0.2–5.4%) / 1                                        | 1 (1%, 0.2–5.4%) / 1  | –                     |
| Arthralgia                                                    | 3 (1%, 0.3–2.9%) / 3                                        | 1 (0.3%, 0.1–1.9%) / 1     | 2 (0.7%, 0.2–2.4%) / 2     | –                                                           | –                     | –                     |
| Lumbar pain                                                   | –                                                           | –                          | –                          | 1 (1%, 0.2–5.4%) / 1                                        | 1 (1%, 0.2–5.4%) / 1  | –                     |
| Myalgia                                                       | 5 (1.7%, 0.7–3.9%) / 5                                      | 2 (0.7%, 0.2–2.4%) / 2     | 3 (1%, 0.3–2.9%) / 3       | –                                                           | –                     | –                     |
| <b>Gastrointestinal tract disorders</b>                       | 3 (1%, 0.3–2.9%) / 4                                        | 1 (0.3%, 0.1–1.9%) / 1     | 2 (0.7%, 0.2–2.4%) / 3     | 1 (1%, 0.2–5.4%) / 1                                        | –                     | 1 (1%, 0.2–5.4%) / 1  |
| Diarrhea                                                      | 1 (0.3%, 0.1–1.9%) / 1                                      | –                          | 1 (0.3%, 0.1–1.9%) / 1     | 1 (1%, 0.2–5.4%) / 1                                        | –                     | 1 (1%, 0.2–5.4%) / 1  |
| Pyrosis                                                       | 1 (0.3%, 0.1–1.9%) / 1                                      | 1 (0.3%, 0.1–1.9%) / 1     | –                          | –                                                           | –                     | –                     |
| Nausea                                                        | 2 (0.7%, 0.2–2.4%) / 2                                      | –                          | 2 (0.7%, 0.2–2.4%) / 2     | –                                                           | –                     | –                     |
| <b>Hearing disorders</b>                                      | 1 (0.3%, 0.1–1.9%) / 1                                      | 1 (0.3%, 0.1–1.9%) / 1     | –                          | –                                                           | –                     | –                     |
| Ear congestion                                                | 1 (0.3%, 0.1–1.9%) / 1                                      | 1 (0.3%, 0.1–1.9%) / 1     | –                          | –                                                           | –                     | –                     |
| <b>Disorders of respiratory system and mediastinal organs</b> | 7 (2.3%, 1.1–4.8%) / 7                                      | 2 (0.7%, 0.2–2.4%) / 2     | 5 (1.7%, 0.7–3.9%) / 5     | 3 (3%, 1.0–8.5%) / 5                                        | 1 (1%, 0.2–5.4%) / 1  | 2 (2%, 0.6–7.0%) / 4  |
| Throat pain                                                   | 2 (0.7%, 0.2–2.4%) / 2                                      | –                          | 2 (0.7%, 0.2–2.4%) / 2     | 1 (1%, 0.2–5.4%) / 2                                        | –                     | 1 (1%, 0.2–5.4%) / 2  |
| Pain in the oropharynx                                        | 1 (0.3%, 0.1–1.9%) / 1                                      | –                          | 1 (0.3%, 0.1–1.9%) / 1     | 1 (1%, 0.2–5.4%) / 1                                        | –                     | 1 (1%, 0.2–5.4%) / 1  |
| Cough                                                         | 1 (0.3%, 0.1–1.9%) / 1                                      | –                          | 1 (0.3%, 0.1–1.9%) / 1     | 1 (1%, 0.2–5.4%) / 1                                        | –                     | 1 (1%, 0.2–5.4%) / 1  |
| Impaired sense of smell                                       | 1 (0.3%, 0.1–1.9%) / 1                                      | 1 (0.3%, 0.1–1.9%) / 1     | –                          | –                                                           | –                     | –                     |
| Dyspnea                                                       | 1 (0.3%, 0.1–1.9%) / 1                                      | –                          | 1 (0.3%, 0.1–1.9%) / 1     | –                                                           | –                     | –                     |
| Sore throat                                                   | 1 (0.3%, 0.1–1.9%) / 1                                      | 1 (0.3%, 0.1–1.9%) / 1     | –                          | 1 (1%, 0.2–5.4%) / 1                                        | 1 (1%, 0.2–5.4%) / 1  | –                     |
| <b>Metabolic disorders</b>                                    | 3 (1%, 0.3–2.9%) / 9                                        | –                          | 3 (1%, 0.3–2.9%) / 9       | 1 (1%, 0.2–5.4%) / 1                                        | –                     | 1 (1%, 0.2–5.4%) / 1  |
| Impaired appetite                                             | 3 (1%, 0.3–2.9%) / 9                                        | –                          | 3 (1%, 0.3–2.9%) / 9       | 1 (1%, 0.2–5.4%) / 1                                        | –                     | 1 (1%, 0.2–5.4%) / 1  |
| <b>Other</b>                                                  | 1 (0.3%, 0.1–1.9%) / 1                                      | –                          | 1 (0.3%, 0.1–1.9%) / 1     | –                                                           | –                     | –                     |
| Death from acute circulatory disorder                         | 1 (0.3%, 0.1–1.9%) / 1                                      | –                          | 1 (0.3%, 0.1–1.9%) / 1     | –                                                           | –                     | –                     |

**Supplementary Table S3.** Adverse events observed in the Vaccine Group and in the Placebo Group within 28 days following each vaccination by relation to vaccination

| Adverse event                               | Relation to vaccination | Vaccine<br>Number of participants with AEs (%; 95% CI) / number of AEs |                            |                           | Placebo<br>Number of participants with AEs (%; 95% CI) / number of AEs |                       |                       |
|---------------------------------------------|-------------------------|------------------------------------------------------------------------|----------------------------|---------------------------|------------------------------------------------------------------------|-----------------------|-----------------------|
|                                             |                         | Total participants<br>N=298                                            | Within 28 days after       |                           | Total participants<br>N=100                                            | Within 28 days after  |                       |
|                                             |                         |                                                                        | First dose                 | Second dose               |                                                                        | First dose            | Second dose           |
| Local and systemic reactions                | Definite                | 47 (15.8%, 12.1–20.3%) / 58                                            | 31 (10.4%, 7.4–14.4%) / 32 | 25 (8.4%, 5.7–12.1%) / 26 | 11 (11%, 6.3–18.6%) / 14                                               | 5 (5%, 2.2–11.2%) / 6 | 7 (7%, 3.4–13.7%) / 8 |
|                                             | Probable                | 3 (1%, 0.3–2.9%) / 3                                                   | 1 (0.3%, 0.1–1.9%) / 1     | 2 (0.7%, 0.2–2.4%) / 2    | 1 (1%, 0.2–5.4%) / 4                                                   | –                     | 1 (1%, 0.2–5.4%) / 4  |
|                                             | Possible                | 5 (1.7%, 0.7–3.9%) / 6                                                 | 3 (1%, 0.3–2.9%) / 4       | 2 (0.7%, 0.2–2.4%) / 2    |                                                                        |                       |                       |
|                                             | Unlikely                | 3 (1%, 0.3–2.9%) / 3                                                   |                            | 3 (1%, 0.3–2.9%) / 3      | 1 (1%, 0.2–5.4%) / 1                                                   |                       | 1 (1%, 0.2–5.4%) / 1  |
|                                             | Unrelated               | 5 (1.7%, 0.7–3.9%) / 13                                                | 2 (0.7%, 0.2–2.4%) / 2     | 3 (1%, 0.3–2.9%) / 11     | 2 (2%, 0.6–7.0%) / 2                                                   | 2 (2%, 0.6–7.0%) / 2  |                       |
|                                             | Unknown                 | 1 (0.3%, 0.1–1.9%) / 1                                                 | –                          | 1 (0.3%, 0.1–1.9%) / 1    | 1 (1%, 0.2–5.4%) / 2                                                   | –                     | 1 (1%, 0.2–5.4%) / 2  |
| Pain at the injection site                  | Definite                | 46 (15.4%, 11.8–20.0%) / 54                                            | 30 (10.1%, 7.1–14.0%) / 30 | 24 (8.1%, 5.5–11.7%) / 24 | 10 (10%, 5.5–17.4%) / 11                                               | 5 (5%, 2.2–11.2%) / 5 | 6 (6%, 2.8–12.5%) / 6 |
|                                             | Probable                |                                                                        |                            |                           | 1 (1%, 0.2–5.4%) / 1                                                   | –                     | 1 (1%, 0.2–5.4%) / 1  |
|                                             | Possible                | 2 (0.7%, 0.2–2.4%) / 2                                                 | 1 (0.3%, 0.1–1.9%) / 1     | 1 (0.3%, 0.1–1.9%) / 1    |                                                                        |                       |                       |
| Induration at the injection site            | Definite                | 3 (1%, 0.3–2.9%) / 3                                                   | 1 (0.3%, 0.1–1.9%) / 1     | 2 (0.7%, 0.2–2.4%) / 2    | 2 (2%, 0.6–7.0%) / 2                                                   | –                     | 2 (2%, 0.6–7.0%) / 2  |
|                                             | Probable                |                                                                        |                            |                           | 1 (1%, 0.2–5.4%) / 1                                                   |                       | 1 (1%, 0.2–5.4%) / 1  |
| Hematoma at the injection site              | Definite                | –                                                                      | –                          | –                         | 1 (1%, 0.2–5.4%) / 1                                                   | 1 (1%, 0.2–5.4%) / 1  | –                     |
| Swelling at the injection site              | Probable                |                                                                        |                            |                           | 1 (1%, 0.2–5.4%) / 1                                                   |                       | 1 (1%, 0.2–5.4%) / 1  |
| Itching at the injection site               | Probable                |                                                                        |                            |                           | 1 (1%, 0.2–5.4%) / 1                                                   |                       | 1 (1%, 0.2–5.4%) / 1  |
| Fever                                       | Definite                | 1 (0.3%, 0.1–1.9%) / 1                                                 | 1 (0.3%, 0.1–1.9%) / 1     | –                         | –                                                                      | –                     | –                     |
|                                             | Probable                | 3 (1%, 0.3–2.9%) / 3                                                   | 1 (0.3%, 0.1–1.9%) / 1     | 2 (0.7%, 0.2–2.4%) / 2    | –                                                                      |                       | –                     |
|                                             | Possible                | 3 (1%, 0.3–2.9%) / 3                                                   | 2 (0.7%, 0.2–2.4%) / 2     | 1 (0.3%, 0.1–1.9%) / 1    | –                                                                      | –                     | –                     |
|                                             | Unlikely                | 2 (0.7%, 0.2–2.4%) / 2                                                 | –                          | 2 (0.7%, 0.2–2.4%) / 2    | –                                                                      | –                     | –                     |
|                                             | Unrelated               | 4 (1.3%, 0.5–3.4%) / 5                                                 | 2 (0.7%, 0.2–2.4%) / 2     | 2 (0.7%, 0.2–2.4%) / 3    | 2 (2%, 0.6–7.0%) / 2                                                   | 2 (2%, 0.6–7.0%) / 2  | –                     |
| Malaise                                     | Possible                | 1 (0.3%, 0.1–1.9%) / 1                                                 | 1 (0.3%, 0.1–1.9%) / 1     | –                         | –                                                                      | –                     | –                     |
|                                             | Unlikely                | 1 (0.3%, 0.1–1.9%) / 1                                                 |                            | 1 (0.3%, 0.1–1.9%) / 1    | 1 (1%, 0.2–5.4%) / 1                                                   |                       | 1 (1%, 0.2–5.4%) / 1  |
|                                             | Unrelated               | 2 (0.7%, 0.2–2.4%) / 8                                                 | –                          | 2 (0.7%, 0.2–2.4%) / 8    | 1 (1%, 0.2–5.4%) / 2                                                   | –                     | 1 (1%, 0.2–5.4%) / 2  |
|                                             | Unknown                 | 1 (0.3%, 0.1–1.9%) / 1                                                 |                            | 1 (0.3%, 0.1–1.9%) / 1    |                                                                        |                       |                       |
| Laboratory methods                          | Possible                | 2 (0.7%, 0.2–2.4%) / 5                                                 |                            | 2 (0.7%, 0.2–2.4%) / 5    |                                                                        |                       |                       |
|                                             | Unlikely                | 1 (0.3%, 0.1–1.9%) / 1                                                 | 1 (0.3%, 0.1–1.9%) / 1     | –                         | –                                                                      |                       |                       |
|                                             | Unrelated               | 19 (6.4%, 4.1–9.7%) / 19                                               | 7 (2.3%, 1.1–4.8%) / 7     | 12 (4%, 2.3–6.9%) / 12    | 7 (7%, 3.4–13.7%) / 7                                                  | 2 (2%, 0.6–7.0%) / 2  | 5 (5%, 2.2–11.2%) / 5 |
| Increased leukocytes content                | Unlikely                | 1 (0.3%, 0.1–1.9%) / 1                                                 | 1 (0.3%, 0.1–1.9%) / 1     | –                         | –                                                                      | –                     | –                     |
| Positive SARS-CoV-2 PCR test                | Unrelated               | 18 (6%, 3.9–9.3%) / 18                                                 | 7 (2.3%, 1.1–4.8%) / 7     | 11 (3.7%, 2.1–6.5%) / 11  | 6 (6%, 2.8–12.5%) / 6                                                  | 2 (2%, 0.6–7.0%) / 2  | 4 (4%, 1.6–9.8%) / 4  |
| Increased creatine phosphokinase level      | Possible                | 2 (0.7%, 0.2–2.4%) / 2                                                 |                            | 2 (0.7%, 0.2–2.4%) / 2    |                                                                        |                       |                       |
|                                             | Unrelated               | 1 (0.3%, 0.1–1.9%) / 1                                                 | –                          | 1 (0.3%, 0.1–1.9%) / 1    | 1 (1%, 0.2–5.4%) / 1                                                   | –                     | 1 (1%, 0.2–5.4%) / 1  |
| Increased ALT level                         | Possible                | 1 (0.3%, 0.1–1.9%) / 1                                                 | –                          | 1 (0.3%, 0.1–1.9%) / 1    | –                                                                      | –                     | –                     |
| Increased AST level                         | Possible                | 1 (0.3%, 0.1–1.9%) / 1                                                 | –                          | 1 (0.3%, 0.1–1.9%) / 1    | –                                                                      | –                     | –                     |
| Increased CRP level                         | Possible                | 1 (0.3%, 0.1–1.9%) / 1                                                 | –                          | 1 (0.3%, 0.1–1.9%) / 1    | –                                                                      | –                     | –                     |
| <b>Blood and lymphatic system disorders</b> | Unlikely                | 1 (0.3%, 0.1–1.9%) / 1                                                 | 1 (0.3%, 0.1–1.9%) / 1     | –                         |                                                                        |                       |                       |
| Inguinal lymphadenitis                      | Unlikely                | 1 (0.3%, 0.1–1.9%) / 1                                                 | 1 (0.3%, 0.1–1.9%) / 1     | –                         | –                                                                      | –                     | –                     |
| <b>Blood vessel disorders</b>               |                         |                                                                        |                            |                           | 1 (1%, 0.2–5.4%) / 1                                                   | 1 (1%, 0.2–5.4%) / 1  | –                     |
| Deep venous leg thrombosis                  | Unrelated               | –                                                                      | –                          | –                         | 1 (1%, 0.2–5.4%) / 1                                                   | 1 (1%, 0.2–5.4%) / 1  | –                     |
| Infections and parasitic invasions          | Possible                | 1 (0.3%, 0.1–1.9%) / 1                                                 | 1 (0.3%, 0.1–1.9%) / 1     | –                         |                                                                        |                       |                       |
|                                             | Unlikely                | 1 (0.3%, 0.1–1.9%) / 1                                                 | –                          | 1 (0.3%, 0.1–1.9%) / 1    |                                                                        |                       |                       |
|                                             | Unrelated               | 27 (9.1%, 6.3–12.9%) / 27                                              | 17 (5.7%, 3.6–8.9%) / 17   | 10 (3.4%, 1.8–6.1%) / 10  | 4 (4%, 1.6–9.8%) / 4                                                   | 2 (2%, 0.6–7.0%) / 2  | 2 (2%, 0.6–7.0%) / 2  |
| SARS-CoV-2 infection                        | Unrelated               | 25 (8.4%, 5.7–12.1%) / 25                                              | 16 (5.4%, 3.3–8.5%) / 16   | 9 (3%, 1.6–5.6%) / 9      | 4 (4%, 1.6–9.8%) / 4                                                   | 2 (2%, 0.6–7.0%) / 2  | 2 (2%, 0.6–7.0%) / 2  |
| Candidiasis                                 | Unlikely                | 1 (0.3%, 0.1–1.9%) / 1                                                 | –                          | 1 (0.3%, 0.1–1.9%) / 1    | –                                                                      | –                     | –                     |
| Other upper respiratory tract infections    | Possible                | 1 (0.3%, 0.1–1.9%) / 1                                                 | 1 (0.3%, 0.1–1.9%) / 1     | –                         |                                                                        |                       |                       |
|                                             | Unrelated               | 2 (0.7%, 0.2–2.4%) / 2                                                 | 1 (0.3%, 0.1–1.9%) / 1     | 1 (0.3%, 0.1–1.9%) / 1    |                                                                        |                       |                       |
| Nervous system disorders                    | Possible                | 6 (2%, 0.9–4.3%) / 7                                                   | 3 (1%, 0.3–2.9%) / 3       | 4 (1.3%, 0.5–3.4%) / 4    | 1 (1%, 0.2–5.4%) / 1                                                   | 1 (1%, 0.2–5.4%) / 1  | –                     |
|                                             | Unlikely                | 2 (0.7%, 0.2–2.4%) / 3                                                 | –                          | 2 (0.7%, 0.2–2.4%) / 3    | 1 (1%, 0.2–5.4%) / 1                                                   | 1 (1%, 0.2–5.4%) / 1  | –                     |
|                                             | Unrelated               | 4 (1.3%, 0.5–3.4%) / 9                                                 |                            | 4 (1.3%, 0.5–3.4%) / 9    | 3 (3%, 1.0–8.5%) / 8                                                   | 1 (1%, 0.2–5.4%) / 1  | 2 (2%, 0.6–7.0%) / 7  |
|                                             | Unknown                 | 1 (0.3%, 0.1–1.9%) / 1                                                 | 1 (0.3%, 0.1–1.9%) / 1     | –                         | 1 (1%, 0.2–5.4%) / 2                                                   |                       | 1 (1%, 0.2–5.4%) / 2  |

| Adverse event                                          | Relation to vaccination | Vaccine<br>Number of participants with AEs (%; 95% CI) / number of AEs |                        |                        | Placebo<br>Number of participants with AEs (%; 95% CI) / number of AEs |                      |                      |
|--------------------------------------------------------|-------------------------|------------------------------------------------------------------------|------------------------|------------------------|------------------------------------------------------------------------|----------------------|----------------------|
|                                                        |                         | Total participants<br>N=298                                            | Within 28 days after   |                        | Total participants<br>N=100                                            | Within 28 days after |                      |
|                                                        |                         |                                                                        | First dose             | Second dose            |                                                                        | First dose           | Second dose          |
| Headache                                               | Possible                | 6 (2%, 0.9–4.3%) / 6                                                   | 3 (1%, 0.3–2.9%) / 3   | 3 (1%, 0.3–2.9%) / 3   | 1 (1%, 0.2–5.4%) / 1                                                   | 1 (1%, 0.2–5.4%) / 1 | –                    |
|                                                        | Unlikely                | 2 (0.7%, 0.2–2.4%) / 3                                                 | –                      | 2 (0.7%, 0.2–2.4%) / 3 | 1 (1%, 0.2–5.4%) / 1                                                   | 1 (1%, 0.2–5.4%) / 1 | –                    |
|                                                        | Unrelated               | 4 (1.3%, 0.5–3.4%) / 9                                                 |                        | 4 (1.3%, 0.5–3.4%) / 9 | 3 (3%, 1.0–8.5%) / 8                                                   | 1 (1%, 0.2–5.4%) / 1 | 2 (2%, 0.6–7.0%) / 7 |
|                                                        | Unknown                 | 1 (0.3%, 0.1–1.9%) / 1                                                 | 1 (0.3%, 0.1–1.9%) / 1 | –                      | 1 (1%, 0.2–5.4%) / 2                                                   |                      | 1 (1%, 0.2–5.4%) / 2 |
| Dizziness                                              | Possible                | 1 (0.3%, 0.1–1.9%) / 1                                                 | –                      | 1 (0.3%, 0.1–1.9%) / 1 | –                                                                      | –                    | –                    |
| Musculoskeletal and connective tissue disorders        | Possible                | 2 (0.7%, 0.2–2.4%) / 4                                                 | 1 (0.3%, 0.1–1.9%) / 2 | 1 (0.3%, 0.1–1.9%) / 2 |                                                                        |                      |                      |
|                                                        | Unlikely                | 1 (0.3%, 0.1–1.9%) / 2                                                 |                        | 1 (0.3%, 0.1–1.9%) / 2 | 1 (1%, 0.2–5.4%) / 1                                                   | 1 (1%, 0.2–5.4%) / 1 | –                    |
|                                                        | Unrelated               | 2 (0.7%, 0.2–2.4%) / 2                                                 | 1 (0.3%, 0.1–1.9%) / 1 | 1 (0.3%, 0.1–1.9%) / 1 |                                                                        |                      |                      |
| Arthralgia                                             | Possible                | 2 (0.7%, 0.2–2.4%) / 2                                                 | 1 (0.3%, 0.1–1.9%) / 1 | 1 (0.3%, 0.1–1.9%) / 1 | –                                                                      | –                    | –                    |
|                                                        | Unlikely                | 1 (0.3%, 0.1–1.9%) / 1                                                 |                        | 1 (0.3%, 0.1–1.9%) / 1 |                                                                        |                      |                      |
| Lumbar pain                                            | Unlikely                | –                                                                      | –                      | –                      | 1 (1%, 0.2–5.4%) / 1                                                   | 1 (1%, 0.2–5.4%) / 1 | –                    |
| Myalgia                                                | Possible                | 2 (0.7%, 0.2–2.4%) / 2                                                 | 1 (0.3%, 0.1–1.9%) / 1 | 1 (0.3%, 0.1–1.9%) / 1 | –                                                                      | –                    | –                    |
|                                                        | Unlikely                | 1 (0.3%, 0.1–1.9%) / 1                                                 |                        | 1 (0.3%, 0.1–1.9%) / 1 |                                                                        |                      |                      |
|                                                        | Unrelated               | 2 (0.7%, 0.2–2.4%) / 2                                                 | 1 (0.3%, 0.1–1.9%) / 1 | 1 (0.3%, 0.1–1.9%) / 1 |                                                                        |                      |                      |
| Gastrointestinal tract disorders                       | Possible                | 2 (0.7%, 0.2–2.4%) / 2                                                 |                        | 2 (0.7%, 0.2–2.4%) / 2 |                                                                        |                      |                      |
|                                                        | Unlikely                | 2 (0.7%, 0.2–2.4%) / 2                                                 | 1 (0.3%, 0.1–1.9%) / 1 | 1 (0.3%, 0.1–1.9%) / 1 |                                                                        |                      |                      |
|                                                        | Unrelated               |                                                                        |                        |                        | 1 (1%, 0.2–5.4%) / 1                                                   | –                    | 1 (1%, 0.2–5.4%) / 1 |
| Diarrhea                                               | Possible                | 1 (0.3%, 0.1–1.9%) / 1                                                 | –                      | 1 (0.3%, 0.1–1.9%) / 1 |                                                                        |                      |                      |
|                                                        | Unrelated               |                                                                        |                        |                        | 1 (1%, 0.2–5.4%) / 1                                                   | –                    | 1 (1%, 0.2–5.4%) / 1 |
| Pyrosis                                                | Unlikely                | 1 (0.3%, 0.1–1.9%) / 1                                                 | 1 (0.3%, 0.1–1.9%) / 1 | –                      | –                                                                      | –                    | –                    |
| Nausea                                                 | Possible                | 1 (0.3%, 0.1–1.9%) / 1                                                 | –                      | 1 (0.3%, 0.1–1.9%) / 1 | –                                                                      | –                    | –                    |
|                                                        | Unlikely                | 1 (0.3%, 0.1–1.9%) / 1                                                 | –                      | 1 (0.3%, 0.1–1.9%) / 1 | –                                                                      | –                    | –                    |
| Hearing disorders                                      | Unlikely                | 1 (0.3%, 0.1–1.9%) / 1                                                 | 1 (0.3%, 0.1–1.9%) / 1 | –                      |                                                                        |                      |                      |
| Ear congestion                                         | Unlikely                | 1 (0.3%, 0.1–1.9%) / 1                                                 | 1 (0.3%, 0.1–1.9%) / 1 | –                      | –                                                                      | –                    | –                    |
| Disorders of respiratory system and mediastinal organs | Unlikely                | 2 (0.7%, 0.2–2.4%) / 2                                                 | 1 (0.3%, 0.1–1.9%) / 1 | 1 (0.3%, 0.1–1.9%) / 1 | 1 (1%, 0.2–5.4%) / 1                                                   | 1 (1%, 0.2–5.4%) / 1 | –                    |
|                                                        | Unrelated               | 5 (1.7%, 0.7–3.9%) / 5                                                 | 1 (0.3%, 0.1–1.9%) / 1 | 4 (1.3%, 0.5–3.4%) / 4 | 1 (1%, 0.2–5.4%) / 3                                                   | –                    | 1 (1%, 0.2–5.4%) / 3 |
|                                                        | Unknown                 |                                                                        |                        |                        | 1 (1%, 0.2–5.4%) / 1                                                   | –                    | 1 (1%, 0.2–5.4%) / 1 |
| Throat pain                                            | Unrelated               | 2 (0.7%, 0.2–2.4%) / 2                                                 | –                      | 2 (0.7%, 0.2–2.4%) / 2 | 1 (1%, 0.2–5.4%) / 2                                                   | –                    | 1 (1%, 0.2–5.4%) / 2 |
| Pain in the oropharynx                                 | Unrelated               | 1 (0.3%, 0.1–1.9%) / 1                                                 | –                      | 1 (0.3%, 0.1–1.9%) / 1 | –                                                                      | –                    | –                    |
|                                                        | Unknown                 |                                                                        |                        |                        | 1 (1%, 0.2–5.4%) / 1                                                   | –                    | 1 (1%, 0.2–5.4%) / 1 |
| Cough                                                  | Unlikely                | 1 (0.3%, 0.1–1.9%) / 1                                                 | –                      | 1 (0.3%, 0.1–1.9%) / 1 |                                                                        |                      |                      |
|                                                        | Unknown                 |                                                                        |                        |                        | 1 (1%, 0.2–5.4%) / 1                                                   | –                    | 1 (1%, 0.2–5.4%) / 1 |
| Impaired sense of smell                                | Unrelated               | 1 (0.3%, 0.1–1.9%) / 1                                                 | 1 (0.3%, 0.1–1.9%) / 1 | –                      | –                                                                      | –                    | –                    |
| Dyspnea                                                | Unrelated               | 1 (0.3%, 0.1–1.9%) / 1                                                 | –                      | 1 (0.3%, 0.1–1.9%) / 1 | –                                                                      | –                    | –                    |
| Sore throat                                            | Unlikely                | 1 (0.3%, 0.1–1.9%) / 1                                                 | 1 (0.3%, 0.1–1.9%) / 1 | –                      | 1 (1%, 0.2–5.4%) / 1                                                   | 1 (1%, 0.2–5.4%) / 1 | –                    |
| Metabolic disorders                                    | Possible                | 1 (0.3%, 0.1–1.9%) / 1                                                 |                        | 1 (0.3%, 0.1–1.9%) / 1 |                                                                        |                      |                      |
|                                                        | Unlikely                | 1 (0.3%, 0.1–1.9%) / 1                                                 |                        | 1 (0.3%, 0.1–1.9%) / 1 |                                                                        |                      |                      |
|                                                        | Unrelated               | 1 (0.3%, 0.1–1.9%) / 5                                                 | –                      | 1 (0.3%, 0.1–1.9%) / 5 | 1 (1%, 0.2–5.4%) / 1                                                   | –                    | 1 (1%, 0.2–5.4%) / 1 |
| Impaired appetite                                      | Possible                | 1 (0.3%, 0.1–1.9%) / 1                                                 |                        | 1 (0.3%, 0.1–1.9%) / 1 |                                                                        |                      | –                    |
|                                                        | Unlikely                | 1 (0.3%, 0.1–1.9%) / 1                                                 |                        | 1 (0.3%, 0.1–1.9%) / 1 |                                                                        |                      |                      |
|                                                        | Unrelated               | 1 (0.3%, 0.1–1.9%) / 5                                                 | –                      | 1 (0.3%, 0.1–1.9%) / 5 | 1 (1%, 0.2–5.4%) / 1                                                   | –                    | 1 (1%, 0.2–5.4%) / 1 |
| Other                                                  | Unlikely                | 1 (0.3%, 0.1–1.9%) / 1                                                 | –                      | 1 (0.3%, 0.1–1.9%) / 1 |                                                                        |                      |                      |
| Death from acute circulatory disorder                  | Unlikely                | 1 (0.3%, 0.1–1.9%) / 1                                                 | –                      | 1 (0.3%, 0.1–1.9%) / 1 |                                                                        |                      |                      |

**Supplementary Table S4.** Total adverse events observed in the 60+ age cohort within 21 days following each vaccination

| Adverse event                            | Number of participants with AEs (%) / number of AEs |                      |                 |                  |
|------------------------------------------|-----------------------------------------------------|----------------------|-----------------|------------------|
|                                          | Total participants<br>N=199                         | Within 21 days after |                 |                  |
|                                          |                                                     | First dose           | Second dose     | Third dose       |
| <b>Local and systemic reactions</b>      | 87 (43.5%) / 267                                    | 68 (34%) / 115       | 51 (25.5%) / 84 | 38 (19%) / 68    |
| Asthenia                                 | 5 (2.5%) / 5                                        | 4 (2%) / 4           | 1 (0.5%) / 1    | –                |
| Pain                                     | 3 (1.5%) / 3                                        | –                    | 1 (0.5%) / 1    | 2 (1%) / 2       |
| Pain at the injection site               | 74 (37%) / 123                                      | 56 (28%) / 56        | 40 (20.1%) / 43 | 24 (17%) / 24    |
| Itching at the injection site            | 12 (6%) / 15                                        | 4 (2%) / 4           | 4 (2%) / 4      | 7 (3.5%) / 7     |
| Chills                                   | 9 (4.5%) / 11                                       | 6 (3%) / 7           | 3 (1.5%) / 3    | 1 (0.5%) / 1     |
| Swelling at the injection site           | 5 (2.5%) / 7                                        | 1 (0.5%) / 1         | 2 (1%) / 3      | 3 (1.5%) / 3     |
| Foreign body sensation                   | 1 (0.5%) / 1                                        | 1 (0.5%) / 1         | –               | –                |
| Fever                                    | 8 (4%) / 8                                          | 4 (2%) / 4           | 1 (0.5%) / 1    | 3 (1.5%) / 3     |
| Malaise                                  | 1 (0.5%) / 1                                        | –                    | 1 (0.5%) / 1    | –                |
| Induration at the injection site         | 12 (6%) / 18                                        | 4 (2%) / 4           | 7 (3.5%) / 8    | 6 (3%) / 6       |
| Fatigue                                  | 34 (17%) / 64                                       | 25 (12.5%) / 30      | 14 (7%) / 17    | 14 (7%) / 17     |
| Discomfort at the injection site         | 1 (0.5%) / 1                                        | 1 (0.5%) / 1         | –               | –                |
| Erythema at the injection site           | 9 (4.5%) / 10                                       | 3 (1.5%) / 3         | 2 (1%) / 2      | 5 (2.5%) / 5     |
| <b>Laboratory methods</b>                | 150 (75%) / 318                                     | 72 (36%) / 99        | 63 (31.5%) / 77 | 89 (44.5%) / 142 |
| Proteinuria                              | 6 (3%) / 6                                          | 3 (1.5%) / 3         | –               | 3 (1.5%) / 3     |
| Glycosuria                               | 1 (0.5%) / 1                                        | –                    | –               | 1 (0.5%) / 1     |
| Leukocytes in urine                      | 9 (4.5%) / 10                                       | 2 (1%) / 2           | 3 (1.5%) / 3    | 5 (2.5%) / 5     |
| Abnormal ALT level                       | 3 (1.5%) / 3                                        | 3 (1.5%) / 3         | –               | –                |
| Abnormal glucose level                   | 1 (0.5%) / 1                                        | –                    | –               | 1 (0.5%) / 1     |
| Abnormal urea level                      | 3 (1.5%) / 3                                        | –                    | 1 (0.5%) / 1    | 2 (1%) / 2       |
| Abnormal CRP level                       | 6 (3%) / 7                                          | 1 (0.5%) / 1         | 1 (0.5%) / 1    | 4 (2%) / 5       |
| Abnormal cholesterol level               | 3 (1.5%) / 3                                        | –                    | –               | 3 (1.5%) / 3     |
| Abnormal blood ALP level                 | 5 (2.5%) / 6                                        | –                    | 3 (1.5%) / 3    | 2 (1%) / 3       |
| Increased arterial blood pressure        | 6 (3%) / 11                                         | 4 (2%) / 5           | 3 (1.5%) / 3    | 2 (1%) / 3       |
| Increased diastolic blood pressure       | 10 (5%) / 10                                        | 5 (2.5%) / 5         | 4 (2%) / 4      | 1 (0.5%) / 1     |
| Increased relative density of urine      | 1 (0.5%) / 1                                        | –                    | –               | 1 (0.5%) / 1     |
| Increased systolic blood pressure        | 9 (4.5%) / 9                                        | 5 (2.5%) / 5         | 3 (1.5%) / 3    | 1 (0.5%) / 1     |
| Increased erythrocyte sedimentation rate | 4 (2%) / 4                                          | 2 (1%) / 2           | 1 (0.5%) / 1    | 1 (0.5%) / 1     |
| Increased ALT level                      | 11 (5.5%) / 12                                      | 4 (2%) / 4           | 1 (0.5%) / 1    | 6 (3%) / 7       |
| Increased AST level                      | 13 (6.5%) / 16                                      | 5 (2.5%) / 5         | 2 (1%) / 2      | 7 (3.5%) / 9     |
| Increased bilirubin level                | 10 (5%) / 12                                        | 3 (1.5%) / 3         | 4 (2%) / 4      | 5 (2.5%) / 5     |
| Increased glucose level                  | 12 (6%) / 15                                        | 4 (2%) / 4           | 4 (2%) / 4      | 6 (3%) / 7       |
| Increased creatinine level               | 3 (1.5%) / 3                                        | 1 (0.5%) / 1         | 1 (0.5%) / 1    | 1 (0.5%) / 1     |
| Increased creatine phosphokinase level   | 18 (9%) / 19                                        | 5 (2.5%) / 5         | 6 (3%) / 6      | 8 (4%) / 8       |
| Increased urea level                     | 12 (6%) / 13                                        | 2 (1%) / 2           | 3 (1.5%) / 3    | 8 (4%) / 8       |
| Increased CRP level                      | 6 (3%) / 6                                          | 2 (1%) / 2           | 3 (1.5%) / 3    | 1 (0.5%) / 1     |

| Adverse event                                                 | Number of participants with AEs (%) / number of AEs |                      |               |                |
|---------------------------------------------------------------|-----------------------------------------------------|----------------------|---------------|----------------|
|                                                               | Total participants<br>N=199                         | Within 21 days after |               |                |
|                                                               |                                                     | First dose           | Second dose   | Third dose     |
| Increased transaminase levels                                 | 1 (0.5%) / 1                                        | –                    | 1 (0.5%) / 1  | –              |
| Increased cholesterol level                                   | 31 (15.5%) / 36                                     | 4 (2%) / 4           | 12 (6%) / 12  | 19 (9.5%) / 20 |
| Increased ALP level                                           | 5 (2.5%) / 6                                        | 2 (1%) / 2           | 1 (0.5%) / 1  | 3 (1.5%) / 3   |
| Increased basophil count                                      | 1 (0.5%) / 2                                        | 1 (0.5%) / 1         | –             | 1 (0.5%) / 1   |
| Increased leukocyte count                                     | 8 (4%) / 8                                          | 7 (3.5%) / 7         | 1 (0.5%) / 1  | –              |
| Increased eosinophil count                                    | 4 (2%) / 4                                          | 1 (0.5%) / 1         | 2 (1%) / 2    | 1 (0.5%) / 1   |
| SARS-CoV-2 infection                                          | 2 (1%) / 2                                          | –                    | 1 (0.5%) / 1  | 1 (0.5%) / 1   |
| Decreased hemoglobin level                                    | 4 (2%) / 4                                          | –                    | –             | 4 (2%) / 4     |
| Decreased glucose level                                       | 4 (2%) / 5                                          | –                    | –             | 4 (2%) / 5     |
| Decreased creatine phosphokinase level                        | 1 (0.5%) / 1                                        | –                    | –             | 1 (0.5%) / 1   |
| Decreased total protein level                                 | 2 (1%) / 2                                          | –                    | –             | 2 (1%) / 2     |
| Decreased lymphocyte count                                    | 3 (1.5%) / 3                                        | 2 (1%) / 2           | 1 (0.5%) / 1  | –              |
| Decreased neutrophil count                                    | 10 (5%) / 11                                        | 8 (4%) / 8           | 1 (0.5%) / 1  | 2 (1%) / 2     |
| Decreased platelet count                                      | 2 (1%) / 2                                          | 1 (0.5%) / 1         | 1 (0.5%) / 1  | –              |
| Increased lymphocyte count                                    | 2 (1%) / 2                                          | 2 (1%) / 2           | –             | –              |
| Cylindruria                                                   | 1 (0.5%) / 1                                        | –                    | 1 (0.5%) / 1  | –              |
| Erythrocytes in urine                                         | 53 (26.5%) / 57                                     | 19 (9.5%) / 19       | 12 (6%) / 12  | 26 (13%) / 26  |
| <b>Gastrointestinal tract disorders</b>                       | 17 (8.5%) / 20                                      | 13 (6.5%) / 13       | 3 (1.5%) / 3  | 3 (1.5%) / 4   |
| Abdominal discomfort                                          | 1 (0.5%) / 1                                        | 1 (0.5%) / 1         | –             | –              |
| Abdominal pain                                                | 1 (0.5%) / 1                                        | 1 (0.5%) / 1         | –             | –              |
| Lip pain                                                      | 1 (0.5%) / 1                                        | 1 (0.5%) / 1         | –             | –              |
| Diarrhea                                                      | 8 (4%) / 9                                          | 4 (2%) / 4           | 2 (1%) / 2    | 3 (1.5%) / 3   |
| Dyspepsia                                                     | 2 (1%) / 2                                          | 2 (1%) / 2           | –             | –              |
| Toothache                                                     | 1 (0.5%) / 1                                        | –                    | 1 (0.5%) / 1  | –              |
| Nausea                                                        | 5 (2.5%) / 5                                        | 4 (2%) / 4           | –             | 1 (0.5%) / 1   |
| <b>Infections and parasitic invasions</b>                     | 31 (15.5%) / 31                                     | 9 (4.5%) / 9         | 9 (4.5%) / 9  | 13 (6.5%) / 13 |
| Upper respiratory tract infections                            | 10 (5%) / 10                                        | 1 (0.5%) / 1         | 6 (3%) / 6    | 3 (1.5%) / 3   |
| SARS-CoV-2 infection                                          | 18 (9%) / 18                                        | 6 (3%) / 6           | 3 (1.5%) / 3  | 9 (4.5%) / 9   |
| Nasal herpes simplex lesions                                  | 1 (0.5%) / 1                                        | 1 (0.5%) / 1         | –             | –              |
| Herpes zoster                                                 | 1 (0.5%) / 1                                        | –                    | –             | 1 (0.5%) / 1   |
| Labial herpes simplex lesions                                 | 1 (0.5%) / 1                                        | 1 (0.5%) / 1         | –             | –              |
| <b>Metabolic and nutrition disorders</b>                      | 16 (8%) / 20                                        | 6 (3%) / 6           | 2 (1%) / 2    | 11 (5.5%) / 12 |
| Hyperglycemia                                                 | 2 (1%) / 2                                          | 1 (0.5%) / 1         | 1 (0.5%) / 1  | –              |
| Hypoglycemia                                                  | 11 (5.5%) / 11                                      | 1 (0.5%) / 1         | 1 (0.5%) / 1  | 9 (4.5%) / 9   |
| Hypoproteinemia                                               | 7 (2.5%) / 7                                        | 4 (2%) / 4           | –             | 3 (1.5%) / 3   |
| <b>Disorders of respiratory system and mediastinal organs</b> | 21 (10.5%) / 33                                     | 8 (4%) / 9           | 9 (4.5%) / 13 | 8 (4%) / 11    |
| Pain in the oropharynx                                        | 5 (2.5%) / 5                                        | 1 (0.5%) / 1         | 2 (1%) / 2    | 2 (1%) / 2     |
| Nasal congestion                                              | 4 (2%) / 4                                          | 1 (0.5%) / 1         | 2 (1%) / 2    | 1 (0.5%) / 1   |

| Adverse event                                             | Number of participants with AEs (%) / number of AEs |                      |                |               |
|-----------------------------------------------------------|-----------------------------------------------------|----------------------|----------------|---------------|
|                                                           | Total participants<br>N=199                         | Within 21 days after |                |               |
|                                                           |                                                     | First dose           | Second dose    | Third dose    |
| Cough                                                     | 6 (3%) / 6                                          | 3 (1.5%) / 3         | 1 (0.5%) / 1   | 2 (1%) / 2    |
| Dyspnea                                                   | 1 (0.5%) / 1                                        | –                    | 1 (0.5%) / 1   | –             |
| Swelling of the pharynx                                   | 2 (1%) / 2                                          | –                    | –              | 2 (1%) / 2    |
| Sore throat                                               | 4 (2%) / 4                                          | 2 (1%) / 2           | 1 (0.5%) / 1   | 1 (0.5%) / 1  |
| Rhinorrhea                                                | 10 (5%) / 10                                        | 2 (1%) / 2           | 5 (2.5%) / 5   | 3 (1.5%) / 3  |
| Sneezing                                                  | 1 (0.5%) / 1                                        | –                    | 1 (0.5%) / 1   | –             |
| <b>Skin and subcutaneous tissue disorders</b>             | 4 (2%) / 4                                          | 3 (1.5%) / 3         | 1 (0.5%) / 1   | –             |
| Hyperhidrosis                                             | 1 (0.5%) / 1                                        | 1 (0.5%) / 1         | –              | –             |
| Itching                                                   | 2 (1%) / 2                                          | 2 (1%) / 2           | –              | –             |
| Rash                                                      | 1 (0.5%) / 1                                        | –                    | 1 (0.5%) / 1   | –             |
| <b>Muscular, skeletal and connective tissue disorders</b> | 27 (13.5%) / 38                                     | 17 (8.5%) / 19       | 8 (4%) / 9     | 9 (4.5%) / 10 |
| Arthralgia                                                | 5 (2.5%) / 6                                        | 2 (1%) / 2           | 2 (1%) / 2     | 1 (0.5%) / 2  |
| Pain in the limb                                          | 2 (1%) / 2                                          | 1 (0.5%) / 1         | –              | 1 (0.5%) / 1  |
| Back pain                                                 | 2 (1%) / 2                                          | 1 (0.5%) / 1         | –              | 1 (0.5%) / 1  |
| Myalgia                                                   | 23 (11.5%) / 27                                     | 14 (7%) / 14         | 7 (3.5%) / 7   | 6 (3%) / 6    |
| Musculoskeletal discomfort                                | 1 (0.5%) / 1                                        | 1 (0.5%) / 1         | –              | –             |
| <b>Nervous system disorders</b>                           | 40 (20%) / 66                                       | 21 (10.5%) / 27      | 19 (9.5%) / 23 | 11 (11%) / 16 |
| Insomnia                                                  | 3 (1.5%) / 3                                        | 1 (0.5%) / 1         | 2 (1%) / 2     | –             |
| Headache                                                  | 35 (17.5%) / 54                                     | 16 (8%) / 21         | 16 (8%) / 19   | 10 (5%) / 14  |
| Dizziness                                                 | 4 (2%) / 4                                          | 2 (1%) / 2           | 1 (0.5%) / 1   | 1 (0.5%) / 1  |
| Discomfort in the head                                    | 1 (0.5%) / 1                                        | –                    | 1 (0.5%) / 1   | –             |
| Syncope                                                   | 1 (0.5%) / 1                                        | –                    | –              | 1 (0.5%) / 1  |
| Somnolence                                                | 2 (1%) / 3                                          | 2 (1%) / 3           | –              | –             |
| <b>Eye disorders</b>                                      | 1 (0.5%) / 2                                        | 1 (0.5%) / 1         | –              | 1 (0.5%) / 1  |
| Hypersecretory lacrimation                                | 1 (0.5%) / 1                                        | 1 (0.5%) / 1         | –              | –             |
| Photopsy                                                  | 1 (0.5%) / 1                                        | –                    | –              | 1 (0.5%) / 1  |
| <b>Hearing disorders</b>                                  | 2 (1%) / 2                                          | 1 (0.5%) / 1         | –              | 1 (0.5%) / 1  |
| Ear congestion                                            | 1 (0.5%) / 1                                        | 1 (0.5%) / 1         | –              | –             |
| tinnitus                                                  | 1 (0.5%) / 1                                        | –                    | –              | 1 (0.5%) / 1  |
| <b>Renal and urinary tract disorders</b>                  | 11 (5.5%) / 11                                      | 7 (3.5%) / 7         | 1 (0.5%) / 1   | 3 (1.5%) / 3  |
| Hematuria                                                 | 2 (1%) / 2                                          | 1 (0.5%) / 1         | 1 (0.5%) / 1   | –             |
| Glycosuria                                                | 1 (0.5%) / 1                                        | 1 (0.5%) / 1         | –              | –             |
| Leukocytes in urine                                       | 4 (2%) / 4                                          | 4 (2%) / 4           | –              | –             |
| Proteinuria                                               | 4 (2%) / 4                                          | 1 (0.5%) / 1         | –              | 3 (1.5%) / 3  |
| <b>Heart disorders</b>                                    | 8 (4%) / 10                                         | 6 (3%) / 6           | –              | 3 (1.5%) / 4  |
| Arrhythmia                                                | 1 (0.5%) / 2                                        | 1 (0.5%) / 1         | –              | 1 (0.5%) / 1  |
| Chest pain                                                | 1 (0.5%) / 1                                        | 1 (0.5%) / 1         | –              | –             |

| Adverse event                                                  | Number of participants with AEs (%) / number of AEs |                      |              |              |
|----------------------------------------------------------------|-----------------------------------------------------|----------------------|--------------|--------------|
|                                                                | Total participants<br>N=199                         | Within 21 days after |              |              |
|                                                                |                                                     | First dose           | Second dose  | Third dose   |
| Bradycardia                                                    | 2 (1%) / 2                                          | 2 (1%) / 2           | –            | –            |
| Discomfort in the heart                                        | 1 (0.5%) / 2                                        | –                    | –            | 1 (0.5%) / 2 |
| Stenocardia                                                    | 2 (1%) / 2                                          | 1 (0.5%) / 1         | –            | 1 (0.5%) / 1 |
| Tachycardia                                                    | 1 (0.5%) / 1                                        | 1 (0.5%) / 1         | –            | –            |
| <b>Vascular disorders</b>                                      | 3 (1.5%) / 3                                        | 1 (0.5%) / 1         | –            | 2 (1%) / 2   |
| Hypertensive crisis                                            | 1 (0.5%) / 1                                        | 1 (0.5%) / 1         | –            | –            |
| Blood vessel rupture                                           | 1 (0.5%) / 1                                        | –                    | –            | 1 (0.5%) / 1 |
| Nosebleed                                                      | 1 (0.5%) / 1                                        | –                    | –            | 1 (0.5%) / 1 |
| <b>Injuries, intoxications and complications of procedures</b> | 2 (1%) / 2                                          | 1 (0.5%) / 1         | 1 (0.5%) / 1 | –            |
| Fracture of the upper limb                                     | 1 (0.5%) / 1                                        | 1 (0.5%) / 1         | –            | –            |
| Meniscus injury                                                | 1 (0.5%) / 1                                        | –                    | 1 (0.5%) / 1 | –            |



**Supplementary Table S5.** Adverse events observed in the 60+ age cohort within 21 days following each vaccination by relation to vaccination

| Adverse event                    | Relation to vaccination | Total participants<br>N=199 | Number of participants with AEs (%) / number of AEs |                 |                 |
|----------------------------------|-------------------------|-----------------------------|-----------------------------------------------------|-----------------|-----------------|
|                                  |                         |                             | Within 21 days after                                |                 |                 |
|                                  |                         |                             | First dose                                          | Second dose     | Third dose      |
| Local and systemic reactions     | Definite                | 60 (30%) / 134              | 45 (22.5%) / 54                                     | 34 (17%) / 47   | 23 (11.5%) / 33 |
|                                  | Probable                | 23 (11.5%) / 38             | 13 (6.5%) / 15                                      | 11 (5.5%) / 13  | 8 (4%) / 10     |
|                                  | Possible                | 35 (17.5%) / 67             | 25 (12.5%) / 36                                     | 12 (6%) / 15    | 13 (6.5%) / 16  |
|                                  | Unlikely                | 8 (4%) / 8                  | 4 (2%) / 4                                          | 2 (1%) / 2      | 2 (1%) / 2      |
|                                  | Unrelated               | 12 (6%) / 20                | 6 (3%) / 6                                          | 7 (3.5%) / 7    | 6 (3%) / 7      |
| Asthenia                         | Possible                | 2 (1%) / 2                  | 2 (1%) / 2                                          | –               | –               |
|                                  | Unlikely                | 1 (0.5%) / 1                | 1 (0.5%) / 1                                        | –               | –               |
|                                  | Unrelated               | 2 (1%) / 2                  | 1 (0.5%) / 1                                        | 1 (0.5%) / 1    | –               |
| Pain                             | Possible                | 2 (1%) / 2                  | –                                                   | 1 (0.5%) / 1    | 1 (0.5%) / 1    |
|                                  | Unrelated               | 1 (0.5%) / 1                | –                                                   | –               | 1 (0.5%) / 1    |
| Pain at the injection site       | Definite                | 59 (29.5%) / 95             | 44 (22%) / 44                                       | 31 (15.6%) / 33 | 18 (9%) / 18    |
|                                  | Probable                | 18 (9%) / 26                | 11 (5.5%) / 11                                      | 9 (4.5%) / 9    | 6 (3%) / 6      |
|                                  | Possible                | 2 (1%) / 2                  | 1 (0.5%) / 1                                        | 1 (0.5%) / 1    | –               |
| Itching at the injection site    | Definite                | 8 (4%) / 10                 | 2 (1%) / 2                                          | 4 (2%) / 4      | 4 (2%) / 4      |
|                                  | Probable                | 2 (1%) / 3                  | 1 (0.5%) / 1                                        | –               | 2 (1%) / 2      |
|                                  | Possible                | 2 (1%) / 2                  | 1 (0.5%) / 1                                        | –               | 1 (0.5%) / 1    |
| Chills                           | Probable                | 1 (0.5%) / 1                | 1 (0.5%) / 1                                        | –               | –               |
|                                  | Possible                | 8 (4%) / 10                 | 5 (2.5%) / 6                                        | 3 (1.5%) / 3    | 1 (0.5%) / 1    |
| Swelling at the injection site   | Definite                | 5 (2.5%) / 6                | 1 (0.5%) / 1                                        | 2 (1%) / 2      | 3 (1.5%) / 3    |
|                                  | Probable                | 1 (0.5%) / 1                | –                                                   | 1 (0.5%) / 1    | –               |
| Foreign body sensation           | Unlikely                | 1 (0.5%) / 1                | 1 (0.5%) / 1                                        | –               | –               |
| Fever                            | Probable                | 1 (0.5%) / 1                | –                                                   | 1 (0.5%) / 1    | –               |
|                                  | Possible                | 4 (2%) / 4                  | 3 (1.5%) / 3                                        | –               | 1 (0.5%) / 1    |
|                                  | Unlikely                | 1 (0.5%) / 1                | 1 (0.5%) / 1                                        | –               | –               |
|                                  | Unrelated               | 2 (1%) / 2                  | –                                                   | –               | 2 (1%) / 2      |
| Malaise                          | Unrelated               | 1 (0.5%) / 1                | –                                                   | 1 (0.5%) / 1    | –               |
| Induration at the injection site | Definite                | 12 (6%) / 16                | 4 (2%) / 4                                          | 6 (3%) / 7      | 5 (2.5%) / 5    |
|                                  | Probable                | 2 (1%) / 2                  | –                                                   | 1 (0.5%) / 1    | 1 (0.5%) / 1    |
| Fatigue                          | Probable                | 2 (1%) / 3                  | 2 (1%) / 2                                          | 1 (0.5%) / 1    | –               |
|                                  | Possible                | 27 (13.5%) / 44             | 19 (9.5%) / 22                                      | 9 (3.5%) / 10   | 11 (5.5%) / 12  |
|                                  | Unlikely                | 4 (2%) / 4                  | 1 (0.5%) / 1                                        | 2 (1%) / 2      | 1 (0.5%) / 1    |
|                                  | Unrelated               | 9 (4.5%) / 13               | 5 (2.5%) / 5                                        | 4 (2%) / 4      | 4 (2%) / 4      |
| Discomfort at the injection site | Possible                | 1 (0.5%) / 1                | 1 (0.5%) / 1                                        | –               | –               |
| Erythema at the injection site   | Definite                | 7 (3.5%) / 7                | 3 (1.5%) / 3                                        | 1 (0.5%) / 1    | 3 (1.5%) / 3    |
|                                  | Probable                | 3 (1.5%) / 3                | –                                                   | 1 (0.5%) / 1    | 2 (1%) / 2      |
| Laboratory methods               | Possible                | 22 (11%) / 28               | 9 (4.5%) / 12                                       | 9 (4.5%) / 10   | 6 (3%) / 6      |
|                                  | Unlikely                | 72 (36%) / 152              | 34 (17%) / 41                                       | 28 (14%) / 39   | 48 (24%) / 72   |

| Adverse event                            | Relation to vaccination | Total participants<br>N=199 | Number of participants with AEs (%) / number of AEs |                 |               |
|------------------------------------------|-------------------------|-----------------------------|-----------------------------------------------------|-----------------|---------------|
|                                          |                         |                             | Within 21 days after                                |                 |               |
|                                          |                         |                             | First dose                                          | Second dose     | Third dose    |
|                                          | Unrelated               | 78 (39%) / 138              | 36 (18%) / 46                                       | 27 (13.5%) / 28 | 42 (21%) / 64 |
| Proteinuria                              | Unrelated               | 6 (3%) / 6                  | 3 (1.5%) / 3                                        | –               | 3 (1.5%) / 3  |
| Glycosuria                               | Unrelated               | 1 (0.5%) / 1                | –                                                   | –               | 1 (0.5%) / 1  |
| Leukocytes in urine                      | Unlikely                | 8 (4%) / 9                  | 1 (0.5%) / 1                                        | 3 (1.5%) / 3    | 5 (2.5%) / 5  |
|                                          | Unrelated               | 1 (0.5%) / 1                | 1 (0.5%) / 1                                        | –               | –             |
| Abnormal ALT level                       | Unrelated               | 3 (1.5%) / 3                | 3 (1.5%) / 3                                        | –               | –             |
| Abnormal glucose level                   | Unrelated               | 1 (0.5%) / 1                | –                                                   | –               | 1 (0.5%) / 1  |
| Abnormal urea level                      | Unrelated               | 3 (1.5%) / 3                | –                                                   | 1 (0.5%) / 1    | 2 (1%) / 2    |
| Abnormal CRP level                       | Unrelated               | 6 (3%) / 7                  | 1 (0.5%) / 1                                        | 1 (0.5%) / 1    | 4 (2%) / 5    |
| Abnormal cholesterol level               | Unrelated               | 3 (1.5%) / 3                | –                                                   | –               | 3 (1.5%) / 3  |
| Abnormal blood ALP level                 | Unrelated               | 5 (2.5%) / 6                | –                                                   | 3 (1.5%) / 3    | 2 (1%) / 3    |
| Increased arterial blood pressure        | Possible                | 1 (0.5%) / 1                | –                                                   | –               | 1 (0.5%) / 1  |
|                                          | Unlikely                | 4 (2%) / 6                  | 4 (2%) / 4                                          | 1 (0.5%) / 1    | 1 (0.5%) / 1  |
|                                          | Unrelated               | 3 (1.5%) / 4                | 1 (0.5%) / 1                                        | 2 (1%) / 2      | 1 (0.5%) / 1  |
| Increased diastolic blood pressure       | Unlikely                | 7 (3.5%) / 7                | 4 (2%) / 4                                          | 3 (1.5%) / 3    | –             |
|                                          | Unrelated               | 3 (1.5%) / 3                | 1 (0.5%) / 1                                        | 1 (0.5%) / 1    | 1 (0.5%) / 1  |
| Increased relative density of urine      | Unlikely                | 1 (0.5%) / 1                | –                                                   | –               | 1 (0.5%) / 1  |
| Increased systolic blood pressure        | Unlikely                | 2 (1%) / 2                  | 1 (0.5%) / 1                                        | 1 (0.5%) / 1    | –             |
|                                          | Unrelated               | 7 (3.5%) / 7                | 4 (2%) / 4                                          | 2 (1%) / 2      | 1 (0.5%) / 1  |
| Increased erythrocyte sedimentation rate | Possible                | 1 (0.5%) / 1                | –                                                   | 1 (0.5%) / 1    | –             |
|                                          | Unlikely                | 2 (1%) / 2                  | 1 (0.5%) / 1                                        | –               | 1 (0.5%) / 1  |
|                                          | Unrelated               | 1 (0.5%) / 1                | 1 (0.5%) / 1                                        | –               | –             |
| Increased ALT level                      | Unlikely                | 8 (4%) / 9                  | 4 (2%) / 4                                          | –               | 4 (2%) / 5    |
|                                          | Unrelated               | 3 (1.5%) / 3                | –                                                   | 1 (0.5%) / 1    | 2 (1%) / 2    |
| Increased AST level                      | Unlikely                | 10 (5%) / 12                | 4 (2%) / 4                                          | 2 (1%) / 2      | 5 (2.5%) / 6  |
|                                          | Unrelated               | 4 (2%) / 4                  | 1 (0.5%) / 1                                        | –               | 3 (1.5%) / 3  |
| Increased bilirubin level                | Unlikely                | 6 (3%) / 6                  | 2 (1%) / 2                                          | 2 (1%) / 2      | 2 (1%) / 2    |
|                                          | Unrelated               | 5 (2.5%) / 6                | 1 (0.5%) / 1                                        | 2 (1%) / 2      | 3 (1.5%) / 3  |
| Increased glucose level                  | Unlikely                | 9 (4.5%) / 11               | 3 (1.5%) / 3                                        | 2 (1%) / 2      | 5 (2.5%) / 6  |
|                                          | Unrelated               | 3 (1.5%) / 4                | 1 (0.5%) / 1                                        | 2 (1%) / 2      | 1 (0.5%) / 1  |
| Increased creatinine level               | Unlikely                | 1 (0.5%) / 1                | –                                                   | 1 (0.5%) / 1    | –             |
|                                          | Unrelated               | 2 (1%) / 2                  | 1 (0.5%) / 1                                        | –               | 1 (0.5%) / 1  |
| Increased creatine phosphokinase level   | Possible                | 4 (2%) / 4                  | 1 (0.5%) / 1                                        | 2 (1%) / 2      | 1 (0.5%) / 1  |
|                                          | Unlikely                | 11 (5.5%) / 11              | 1 (0.5%) / 1                                        | 4 (2%) / 4      | 6 (3%) / 6    |
|                                          | Unrelated               | 4 (2%) / 4                  | 3 (1.5%) / 3                                        | –               | 1 (0.5%) / 1  |
| Increased urea level                     | Unlikely                | 8 (4%) / 9                  | 2 (1%) / 2                                          | 2 (1%) / 2      | 5 (2.5%) / 5  |
|                                          | Unrelated               | 4 (2%) / 4                  | –                                                   | 1 (0.5%) / 1    | 3 (1.5%) / 3  |
| Increased CRP level                      | Possible                | 4 (2%) / 4                  | 2 (1%) / 2                                          | 2 (1%) / 2      | –             |

| Adverse event                          | Relation to vaccination | Total participants<br>N=199 | Number of participants with AEs (%) / number of AEs |              |              |
|----------------------------------------|-------------------------|-----------------------------|-----------------------------------------------------|--------------|--------------|
|                                        |                         |                             | Within 21 days after                                |              |              |
|                                        |                         |                             | First dose                                          | Second dose  | Third dose   |
|                                        | Unlikely                | 2 (1%) / 2                  | –                                                   | 1 (0.5%) / 1 | 1 (0.5%) / 1 |
| Increased transaminase levels          | Unrelated               | 1 (0.5%) / 1                | –                                                   | 1 (0.5%) / 1 | –            |
| Increased cholesterol level            | Possible                | 1 (0.5%) / 1                | 1 (0.5%) / 1                                        | –            | –            |
|                                        | Unlikely                | 16 (8%) / 17                | 1 (0.5%) / 1                                        | 7 (3.5%) / 7 | 9 (4.5%) / 9 |
|                                        | Unrelated               | 14 (7%) / 18                | 2 (1%) / 2                                          | 5 (2.5%) / 5 | 10 (5%) / 11 |
| Increased ALP level                    | Unlikely                | 3 (1.5%) / 4                | 1 (0.5%) / 1                                        | 1 (0.5%) / 1 | 2 (1%) / 2   |
|                                        | Unrelated               | 2 (1%) / 2                  | 1 (0.5%) / 1                                        | –            | 1 (0.5%) / 1 |
| Increased basophil count               | Possible                | 1 (0.5%) / 1                | 1 (0.5%) / 1                                        | –            | –            |
|                                        | Unrelated               | 1 (0.5%) / 1                | –                                                   | –            | 1 (0.5%) / 1 |
| Increased leukocyte count              | Unrelated               | 8 (4%) / 8                  | 7 (3.5%) / 7                                        | 1 (0.5%) / 1 | –            |
| Increased eosinophil count             | Possible                | 3 (1.5%) / 3                | 1 (0.5%) / 1                                        | 2 (1%) / 2   | –            |
|                                        | Unlikely                | 1 (0.5%) / 1                | –                                                   | –            | 1 (0.5%) / 1 |
| SARS-CoV-2 infection                   | Unrelated               | 2 (1%) / 2                  | –                                                   | 1 (0.5%) / 1 | 1 (0.5%) / 1 |
| Decreased hemoglobin level             | Unlikely                | 2 (1%) / 2                  | –                                                   | –            | 2 (1%) / 2   |
|                                        | Unrelated               | 2 (1%) / 2                  | –                                                   | –            | 2 (1%) / 2   |
| Decreased glucose level                | Unrelated               | 4 (2%) / 5                  | –                                                   | –            | 4 (2%) / 5   |
| Decreased creatine phosphokinase level | Unrelated               | 1 (0.5%) / 1                | –                                                   | –            | 1 (0.5%) / 1 |
| Decreased total protein level          | Unlikely                | 1 (0.5%) / 1                | –                                                   | –            | 1 (0.5%) / 1 |
|                                        | Unrelated               | 1 (0.5%) / 1                | –                                                   | –            | 1 (0.5%) / 1 |
| Decreased lymphocyte count             | Unlikely                | 3 (1.5%) / 3                | 2 (1%) / 2                                          | 1 (0.5%) / 1 | –            |
| Decreased neutrophil count             | Possible                | 4 (2%) / 4                  | 3 (1.5%) / 3                                        | 1 (0.5%) / 1 | –            |
|                                        | Unlikely                | 3 (1.5%) / 3                | 1 (0.5%) / 1                                        | –            | 2 (1%) / 2   |
|                                        | Unrelated               | 4 (2%) / 4                  | 4 (2%) / 4                                          | –            | –            |
| Decreased platelet count               | Unlikely                | 1 (0.5%) / 1                | 1 (0.5%) / 1                                        | –            | –            |
|                                        | Unrelated               | 1 (0.5%) / 1                | –                                                   | 1 (0.5%) / 1 | –            |
| Increased lymphocyte count             | Possible                | 1 (0.5%) / 1                | 1 (0.5%) / 1                                        | –            | –            |
|                                        | Unrelated               | 1 (0.5%) / 1                | 1 (0.5%) / 1                                        | –            | –            |
| Cylindruria                            | Unlikely                | 1 (0.5%) / 1                | –                                                   | 1 (0.5%) / 1 | –            |
| Erythrocytes in urine                  | Possible                | 7 (3.5%) / 8                | 2 (1%) / 2                                          | 2 (1%) / 2   | 4 (2%) / 4   |
|                                        | Unlikely                | 30 (15%) / 31               | 8 (4%) / 8                                          | 7 (3.5%) / 7 | 16 (8%) / 16 |
|                                        | Unrelated               | 16 (8%) / 18                | 9 (4.5%) / 9                                        | 3 (1.5%) / 3 | 6 (3%) / 6   |
| Gastrointestinal tract disorders       | Possible                | 5 (2.5%) / 6                | 4 (2%) / 4                                          | –            | 1 (0.5%) / 2 |
|                                        | Unlikely                | 6 (3%) / 6                  | 3 (1.5%) / 3                                        | 2 (1%) / 2   | 1 (0.5%) / 1 |
|                                        | Unrelated               | 8 (4%) / 8                  | 6 (3%) / 6                                          | 1 (0.5%) / 1 | 1 (0.5%) / 1 |
| Abdominal discomfort                   | Unrelated               | 1 (0.5%) / 1                | 1 (0.5%) / 1                                        | –            | –            |
| Abdominal pain                         | Unlikely                | 1 (0.5%) / 1                | 1 (0.5%) / 1                                        | –            | –            |
| Lip pain                               | Possible                | 1 (0.5%) / 1                | 1 (0.5%) / 1                                        | –            | –            |
| Diarrhea                               | Possible                | 2 (1%) / 2                  | 1 (0.5%) / 1                                        | –            | 1 (0.5%) / 1 |

| Adverse event                                          | Relation to vaccination | Total participants<br>N=199 | Number of participants with AEs (%) / number of AEs |              |                |
|--------------------------------------------------------|-------------------------|-----------------------------|-----------------------------------------------------|--------------|----------------|
|                                                        |                         |                             | Within 21 days after                                |              |                |
|                                                        |                         |                             | First dose                                          | Second dose  | Third dose     |
| Dyspepsia                                              | Unlikely                | 2 (1%) / 2                  | –                                                   | 1 (0.5%) / 1 | 1 (0.5%) / 1   |
|                                                        | Unrelated               | 5 (2.5%) / 5                | 3 (1.5%) / 3                                        | 1 (0.5%) / 1 | 1 (0.5%) / 1   |
|                                                        | Unlikely                | 1 (0.5%) / 1                | 1 (0.5%) / 1                                        | –            | –              |
|                                                        | Unrelated               | 1 (0.5%) / 1                | 1 (0.5%) / 1                                        | –            | –              |
| Toothache                                              | Unlikely                | 1 (0.5%) / 1                | –                                                   | 1 (0.5%) / 1 | –              |
| Nausea                                                 | Possible                | 3 (1.5%) / 3                | 2 (1%) / 2                                          | –            | 1 (0.5%) / 1   |
|                                                        | Unlikely                | 1 (0.5%) / 1                | 1 (0.5%) / 1                                        | –            | –              |
|                                                        | Unrelated               | 1 (0.5%) / 1                | 1 (0.5%) / 1                                        | –            | –              |
| Infections and parasitic invasions                     | Possible                | 1 (0.5%) / 1                | 1 (0.5%) / 1                                        | –            | –              |
|                                                        | Unlikely                | 5 (2.5%) / 5                | 3 (1.5%) / 3                                        | –            | 2 (1%) / 2     |
|                                                        | Unrelated               | 25 (17.5%) / 25             | 5 (2.5%) / 5                                        | 9 (4.5%) / 9 | 11 (5.5%) / 11 |
| Upper respiratory tract infections                     | Unlikely                | 2 (1%) / 2                  | 1 (0.5%) / 1                                        | –            | 1 (0.5%) / 1   |
|                                                        | Unrelated               | 8 (4%) / 8                  | –                                                   | 6 (3%) / 6   | 2 (1%) / 2     |
| SARS-CoV-2 infection                                   | Unlikely                | 2 (1%) / 2                  | 1 (0.5%) / 1                                        | –            | 1 (0.5%) / 1   |
|                                                        | Unrelated               | 16 (8%) / 16                | 5 (2.5%) / 5                                        | 3 (1.5%) / 3 | 8 (4%) / 8     |
| Nasal herpes simplex lesions                           | Unlikely                | 1 (0.5%) / 1                | 1 (0.5%) / 1                                        | –            | –              |
| Herpes zoster                                          | Unrelated               | 1 (0.5%) / 1                | –                                                   | –            | 1 (0.5%) / 1   |
| Labial herpes simplex lesions                          | Possible                | 1 (0.5%) / 1                | 1 (0.5%) / 1                                        | –            | –              |
| Metabolic and nutrition disorders                      | Unlikely                | 11 (5.5%) / 13              | 4 (2%) / 4                                          | –            | 8 (4%) / 9     |
|                                                        | Unrelated               | 7 (3.5%) / 7                | 2 (1%) / 2                                          | 2 (1%) / 2   | 3 (1.5%) / 3   |
| Hyperglycemia                                          | Unlikely                | 1 (0.5%) / 1                | 1 (0.5%) / 1                                        | –            | –              |
|                                                        | Unrelated               | 1 (0.5%) / 1                | –                                                   | 1 (0.5%) / 1 | –              |
| Hypoglycemia                                           | Unlikely                | 7 (3.5%) / 7                | 1 (0.5%) / 1                                        | –            | 6 (6%) / 6     |
|                                                        | Unrelated               | 4 (2%) / 4                  | –                                                   | 1 (0.5%) / 1 | 3 (1.5%) / 3   |
| Hypoproteinemia                                        | Unlikely                | 4 (2%) / 5                  | 2 (1%) / 2                                          | –            | 3 (1.5%) / 3   |
|                                                        | Unrelated               | 2 (1%) / 2                  | 2 (1%) / 2                                          | –            | –              |
| Disorders of respiratory system and mediastinal organs | Possible                | 3 (1.5%) / 5                | –                                                   | 2 (1%) / 3   | 1 (0.5%) / 2   |
|                                                        | Unlikely                | 9 (4.5%) / 12               | 4 (2%) / 5                                          | 3 (1.5%) / 5 | 2 (1%) / 2     |
|                                                        | Unrelated               | 11 (5.5%) / 16              | 4 (2%) / 4                                          | 4 (2%) / 5   | 5 (2.5%) / 7   |
| Pain in the oropharynx                                 | Unlikely                | 2 (1%) / 2                  | 1 (0.5%) / 1                                        | 1 (0.5%) / 1 | –              |
|                                                        | Unrelated               | 3 (1.5%) / 3                | –                                                   | 1 (0.5%) / 1 | 2 (1%) / 2     |
| Nasal congestion                                       | Possible                | 2 (1%) / 2                  | –                                                   | 1 (0.5%) / 1 | 1 (0.5%) / 1   |
|                                                        | Unrelated               | 2 (1%) / 2                  | 1 (0.5%) / 1                                        | 1 (0.5%) / 1 | –              |
| Cough                                                  | Unlikely                | 4 (2%) / 4                  | 2 (1%) / 2                                          | 1 (0.5%) / 1 | 1 (0.5%) / 1   |
|                                                        | Unrelated               | 2 (1%) / 2                  | 1 (0.5%) / 1                                        | –            | 1 (0.5%) / 1   |
| Dyspnea                                                | Unlikely                | 1 (0.5%) / 1                | –                                                   | 1 (0.5%) / 1 | –              |
| Swelling of the pharynx                                | Unlikely                | 1 (0.5%) / 1                | –                                                   | –            | 1 (0.5%) / 1   |
|                                                        | Unrelated               | 1 (0.5%) / 1                | –                                                   | –            | 1 (0.5%) / 1   |

| Adverse event                                      | Relation to vaccination | Total participants<br>N=199 | Number of participants with AEs (%) / number of AEs |              |              |
|----------------------------------------------------|-------------------------|-----------------------------|-----------------------------------------------------|--------------|--------------|
|                                                    |                         |                             | Within 21 days after                                |              |              |
|                                                    |                         |                             | First dose                                          | Second dose  | Third dose   |
| Sore throat                                        | Possible                | 1 (0.5%) / 1                | –                                                   | –            | 1 (0.5%) / 1 |
|                                                    | Unlikely                | 1 (0.5%) / 1                | 1 (0.5%) / 1                                        | –            | –            |
|                                                    | Unrelated               | 2 (1%) / 2                  | 1 (0.5%) / 1                                        | 1 (0.5%) / 1 | –            |
| Rhinorrhea                                         | Possible                | 1 (0.5%) / 1                | –                                                   | 1 (0.5%) / 1 | –            |
|                                                    | Unlikely                | 2 (1%) / 2                  | 1 (0.5%) / 1                                        | 2 (1%) / 2   | –            |
|                                                    | Unrelated               | 6 (6%) / 6                  | 1 (0.5%) / 1                                        | 2 (1%) / 2   | 3 (1.5%) / 3 |
| Sneezing                                           | Possible                | 1 (0.5%) / 1                | –                                                   | 1 (0.5%) / 1 | –            |
| Skin and subcutaneous tissue disorders             | Possible                | 2 (1%) / 2                  | 1 (0.5%) / 1                                        | 1 (0.5%) / 1 | –            |
|                                                    | Unlikely                | 1 (0.5%) / 1                | 1 (0.5%) / 1                                        | –            | –            |
|                                                    | Unrelated               | 1 (0.5%) / 1                | 1 (0.5%) / 1                                        | –            | –            |
| Hyperhidrosis                                      | Unlikely                | 1 (0.5%) / 1                | 1 (0.5%) / 1                                        | –            | –            |
| Itching                                            | Possible                | 1 (0.5%) / 1                | 1 (0.5%) / 1                                        | –            | –            |
|                                                    | Unrelated               | 1 (0.5%) / 1                | 1 (0.5%) / 1                                        | –            | –            |
| Rash                                               | Possible                | 1 (0.5%) / 1                | –                                                   | 1 (0.5%) / 1 | –            |
| Muscular. skeletal and connective tissue disorders | Probable                | 4 (2%) / 4                  | 1 (0.5%) / 1                                        | 3 (1.5%) / 3 | –            |
|                                                    | Possible                | 15 (7.5%) / 17              | 8 (4%) / 9                                          | 3 (1.5%) / 3 | 5 (2.5%) / 5 |
|                                                    | Unlikely                | 3 (1.5%) / 3                | 2 (1%) / 2                                          | –            | 1 (0.5%) / 1 |
|                                                    | Unrelated               | 9 (4.5%) / 14               | 6 (3%) / 7                                          | 2 (1%) / 3   | 3 (1.5%) / 4 |
|                                                    | Possible                | 1 (0.5%) / 1                | –                                                   | 1 (0.5%) / 1 | –            |
| Arthralgia                                         | Unrelated               | 4 (2%) / 5                  | 2 (1%) / 2                                          | 1 (0.5%) / 1 | 1 (0.5%) / 2 |
|                                                    | Unlikely                | 1 (0.5%) / 1                | –                                                   | –            | 1 (0.5%) / 1 |
| Pain in the limb                                   | Unrelated               | 1 (0.5%) / 1                | 1 (0.5%) / 1                                        | –            | –            |
|                                                    | Possible                | 1 (0.5%) / 1                | 1 (0.5%) / 1                                        | –            | –            |
| Back pain                                          | Unrelated               | 1 (0.5%) / 1                | –                                                   | –            | 1 (0.5%) / 1 |
|                                                    | Probable                | 3 (1.5%) / 4                | 1 (0.5%) / 1                                        | 3 (1.5%) / 3 | –            |
| Myalgia                                            | Possible                | 15 (7.5%) / 15              | 8 (4%) / 8                                          | 2 (1%) / 2   | 5 (2.5%) / 5 |
|                                                    | Unlikely                | 2 (1%) / 2                  | 2 (1%) / 2                                          | –            | –            |
|                                                    | Unrelated               | 5 (2.5%) / 6                | 3 (1.5%) / 3                                        | 2 (1%) / 2   | 1 (0.5%) / 1 |
| Musculoskeletal discomfort                         | Unrelated               | 1 (0.5%) / 1                | 1 (0.5%) / 1                                        | –            | –            |
| Nervous system disorders                           | Probable                | 3 (1.5%) / 3                | 1 (0.5%) / 1                                        | 2 (1%) / 2   | –            |
|                                                    | Possible                | 22 (11%) / 29               | 10 (5%) / 11                                        | 9 (4.5%) / 9 | 8 (4%) / 9   |
|                                                    | Unlikely                | 10 (5%) / 11                | 5 (2.5%) / 5                                        | 4 (2%) / 4   | 2 (1%) / 2   |
|                                                    | Unrelated               | 13 (6.5%) / 23              | 7 (3.5%) / 10                                       | 6 (3%) / 8   | 3 (1.5%) / 5 |
| Insomnia                                           | Unlikely                | 3 (1.5%) / 3                | 1 (0.5%) / 1                                        | 2 (1%) / 2   | –            |
| Headache                                           | Probable                | 3 (1.5%) / 3                | 1 (0.5%) / 1                                        | 2 (1%) / 2   | –            |
|                                                    | Possible                | 21 (10.5%) / 28             | 9 (4.5%) / 10                                       | 9 (4.5%) / 9 | 8 (4%) / 9   |
|                                                    | Unlikely                | 4 (2%) / 4                  | 2 (1%) / 2                                          | 2 (1%) / 2   | –            |
|                                                    | Unrelated               | 12 (6%) / 19                | 5 (2.5%) / 8                                        | 5 (2.5%) / 6 | 3 (1.5%) / 5 |

| Adverse event                                                  | Relation to vaccination | Total participants<br>N=199 | Number of participants with AEs (%) / number of AEs |              |              |
|----------------------------------------------------------------|-------------------------|-----------------------------|-----------------------------------------------------|--------------|--------------|
|                                                                |                         |                             | Within 21 days after                                |              |              |
|                                                                |                         |                             | First dose                                          | Second dose  | Third dose   |
| Dizziness                                                      | Unlikely                | 3 (1.5%) / 3                | 2 (1%) / 2                                          | –            | 1 (0.5%) / 1 |
|                                                                | Unrelated               | 1 (0.5%) / 1                | –                                                   | 1 (0.5%) / 1 | –            |
| Discomfort in the head                                         | Unrelated               | 1 (0.5%) / 1                | –                                                   | 1 (0.5%) / 1 | –            |
| Syncope                                                        | Unlikely                | 1 (0.5%) / 1                | –                                                   | –            | 1 (0.5%) / 1 |
| Somnolence                                                     | Possible                | 1 (0.5%) / 1                | 1 (0.5%) / 1                                        | –            | –            |
|                                                                | Unrelated               | 2 (1%) / 2                  | 2 (1%) / 2                                          | –            | –            |
| <b>Eye disorders</b>                                           | Unrelated               | 1 (0.5%) / 2                | 1 (0.5%) / 1                                        | –            | 1 (0.5%) / 1 |
| Hypersecretory lacrimation                                     | Unrelated               | 1 (0.5%) / 1                | 1 (0.5%) / 1                                        | –            | –            |
| Photopsy                                                       | Unrelated               | 1 (0.5%) / 1                | –                                                   | –            | 1 (0.5%) / 1 |
| <b>Hearing disorders</b>                                       | Possible                | 1 (0.5%) / 1                | –                                                   | –            | 1 (0.5%) / 1 |
|                                                                | Unrelated               | 1 (0.5%) / 1                | 1 (0.5%) / 1                                        | –            | –            |
| Ear congestion                                                 | Unrelated               | 1 (0.5%) / 1                | 1 (0.5%) / 1                                        | –            | –            |
| tinnitus                                                       | Possible                | 1 (0.5%) / 1                | –                                                   | –            | 1 (0.5%) / 1 |
|                                                                | Possible                | 2 (1%) / 2                  | 2 (1%) / 2                                          | –            | –            |
| <b>Renal and urinary tract disorders</b>                       | Unlikely                | 7 (3.5%) / 7                | 4 (2%) / 4                                          | –            | 3 (1.5%) / 3 |
|                                                                | Unrelated               | 2 (1%) / 2                  | 1 (0.5%) / 1                                        | 1 (0.5%) / 1 | –            |
| Hematuria                                                      | Unlikely                | 1 (0.5%) / 1                | 1 (0.5%) / 1                                        | –            | –            |
|                                                                | Unrelated               | 1 (0.5%) / 1                | –                                                   | 1 (0.5%) / 1 | –            |
| Glycosuria                                                     | Unrelated               | 1 (0.5%) / 1                | 1 (0.5%) / 1                                        | –            | –            |
| Leukocytes in urine                                            | Unlikely                | 4 (2%) / 4                  | 4 (2%) / 4                                          | –            | –            |
| Proteinuria                                                    | Unlikely                | 4 (2%) / 4                  | 1 (0.5%) / 1                                        | –            | 3 (1.5%) / 3 |
| <b>Heart disorders</b>                                         | Unlikely                | 3 (1.5%) / 4                | 3 (1.5%) / 3                                        | –            | 1 (0.5%) / 1 |
|                                                                | Unrelated               | 5 (2.5%) / 6                | 3 (1.5%) / 3                                        | –            | 2 (1%) / 3   |
| Arrhythmia                                                     | Unlikely                | 1 (0.5%) / 2                | 1 (0.5%) / 1                                        | –            | 1 (0.5%) / 1 |
| Chest pain                                                     | Unlikely                | 1 (0.5%) / 1                | 1 (0.5%) / 1                                        | –            | –            |
| Bradycardia                                                    | Unrelated               | 2 (1%) / 2                  | 2 (1%) / 2                                          | –            | –            |
| Discomfort in the heart                                        | Unrelated               | 1 (0.5%) / 2                | –                                                   | –            | 1 (0.5%) / 2 |
| Stenocardia                                                    | Unlikely                | 1 (0.5%) / 1                | 1 (0.5%) / 1                                        | –            | –            |
|                                                                | Unrelated               | 1 (0.5%) / 1                | –                                                   | –            | 1 (0.5%) / 1 |
| Tachycardia                                                    | Unrelated               | 1 (0.5%) / 1                | 1 (0.5%) / 1                                        | –            | –            |
| <b>Vascular disorders</b>                                      | Unrelated               | 3 (1.5%) / 3                | 1 (0.5%) / 1                                        | –            | 2 (1%) / 2   |
| Hypertensive crisis                                            | Unrelated               | 1 (0.5%) / 1                | 1 (0.5%) / 1                                        | –            | –            |
| Blood vessel rupture                                           | Unrelated               | 1 (0.5%) / 1                | –                                                   | –            | 1 (0.5%) / 1 |
| Nosebleed                                                      | Unrelated               | 1 (0.5%) / 1                | –                                                   | –            | 1 (0.5%) / 1 |
| <b>Injuries, intoxications and complications of procedures</b> | Unlikely                | 1 (0.5%) / 1                | –                                                   | 1 (0.5%) / 1 | –            |
|                                                                | Unrelated               | 1 (0.5%) / 1                | 1 (0.5%) / 1                                        | –            | –            |
| Fracture of the upper limb                                     | Unrelated               | 1 (0.5%) / 1                | 1 (0.5%) / 1                                        | –            | –            |
| Meniscus injury                                                | Unlikely                | 1 (0.5%) / 1                | –                                                   | 1 (0.5%) / 1 | –            |

**Supplementary Table S6.** Proportion of participants of the 18–60 age cohort with detectable anti-SARS-CoV-2 antibodies in NT and CMIA at different time points after the first vaccination

| Group   | N   | Test                      | Positive, n (%; 95% CI)                |                             |                             |                                                                |                                                                 |                                                                 |
|---------|-----|---------------------------|----------------------------------------|-----------------------------|-----------------------------|----------------------------------------------------------------|-----------------------------------------------------------------|-----------------------------------------------------------------|
|         |     |                           | Screening                              | Day 7                       | Day 14                      | Day 21<br>(7 days after<br>the 2 <sup>nd</sup><br>vaccination) | Day 28<br>(14 days after<br>the 2 <sup>nd</sup><br>vaccination) | Day 42<br>(28 days after<br>the 2 <sup>nd</sup><br>vaccination) |
| Vaccine | 122 | nAB (NT)                  | 53<br>(43.4, 35.0–<br>52.3)            | 68<br>(55.7, 46.9–<br>64.2) | 92<br>(75.4, 67.1–<br>82.2) | 112<br>(91.8, 85.6–<br>95.5)                                   | 112<br>(91.8, 85.6–<br>95.5)                                    | 113<br>(92.6, 86.6–<br>96.1)                                    |
|         | 101 | anti-RBD IgG<br>(Beckman) | 28<br>(28, 20.1–<br>37.5) <sup>1</sup> | 33<br>(32.7, 24.3–<br>42.3) | 43<br>(42.6, 33.4–<br>52.3) | 44<br>(44.9, 35.4–<br>54.8) <sup>2</sup>                       | 47<br>(46.5, 37.1–<br>56.2)                                     | 44<br>(43.6, 34.3–<br>53.3)                                     |
|         | 101 | anti-N IgG<br>(Abbot)     | 24<br>(24, 16.7–<br>33.2) <sup>1</sup> | 28<br>(27.7, 19.9–<br>37.1) | 34<br>(33.7, 25.2–<br>43.3) | 43<br>(43.9, 34.5–<br>53.7) <sup>2</sup>                       | 57<br>(56.4, 46.7–<br>65.7)                                     | 56<br>(55.4, 45.7–<br>64.8)                                     |
| Placebo | 45  | nAB (NT)                  | 17<br>(37.8, 25.1–<br>52.4)            | 18<br>(40.0, 27.0–<br>54.6) | 19<br>(42.2, 29.0–<br>56.7) | 17<br>(38.6, 25.7–<br>53.4) <sup>3</sup>                       | 17<br>(37.8, 25.1–<br>52.4)                                     | 18<br>(40.9, 27.7–<br>55.6) <sup>3</sup>                        |
|         | 36  | anti-RBD IgG<br>(Beckman) | 10<br>(27.8, 15.8–<br>44)              | 11<br>(30.6, 18–<br>46.9)   | 11<br>(30.6, 18–<br>46.9)   | 11<br>(30.6, 18–46.9)                                          | 11<br>(30.6, 18–46.9)                                           | 9<br>(25, 13.8–41.1)                                            |
|         | 36  | anti-N IgG<br>(Abbot)     | 10<br>(27.8, 15.8–<br>44)              | 10<br>(27.8, 15.8–<br>44)   | 8<br>(22.2, 11.7–<br>38.1)  | 9<br>(25, 13.8–41.1)                                           | 8<br>(22.2, 11.7–<br>38.1)                                      | 8<br>(22.2, 11.7–<br>38.1)                                      |

<sup>1</sup> N = 100; <sup>2</sup> N = 98; <sup>3</sup> N = 44

Due to the lack of defined correlates of protection against COVID-19, initially we determined the optimal method of anti-SARS-CoV-2 humoral immunogenicity assessment by comparing the neutralizing antibody (nAB) detection rates in NT with two commercial CMIA tests commonly used for the screening of anti-N protein IgG (Architect SARS-CoV-2 IgG, Abbott Diagnostics, USA) and anti-RBD IgG (Access SARS-CoV-2 IgG, Beckman, USA). We used NT and both CMIA tests to analyze serum samples from all 167 participants of the 18–60 age cohort (122 from the Vaccine Group and 45 from the Placebo Group) included in Stage 3, obtained at screening and at Days 7, 14, 21, 28 and 42 after the 1<sup>st</sup> immunization (Supplementary Table S6). The analysis included both the participants who were anti-SARS-CoV-2 nAB negative (69/122 in Vaccine Group and 28/45 in Placebo Group) and anti-SARS-CoV-2 nAB positive (53/122 in Vaccine Group and 17/45 in Placebo Group) at screening.

There was no strong correlation between seropositivity rates assessed in NT and CMIA at all time points. Generally, the serum sample with the higher nAB titers produced higher signal in CMIA tests. However, several NT positive serum samples were negative in CMIA with SARS-CoV-2 RBD.

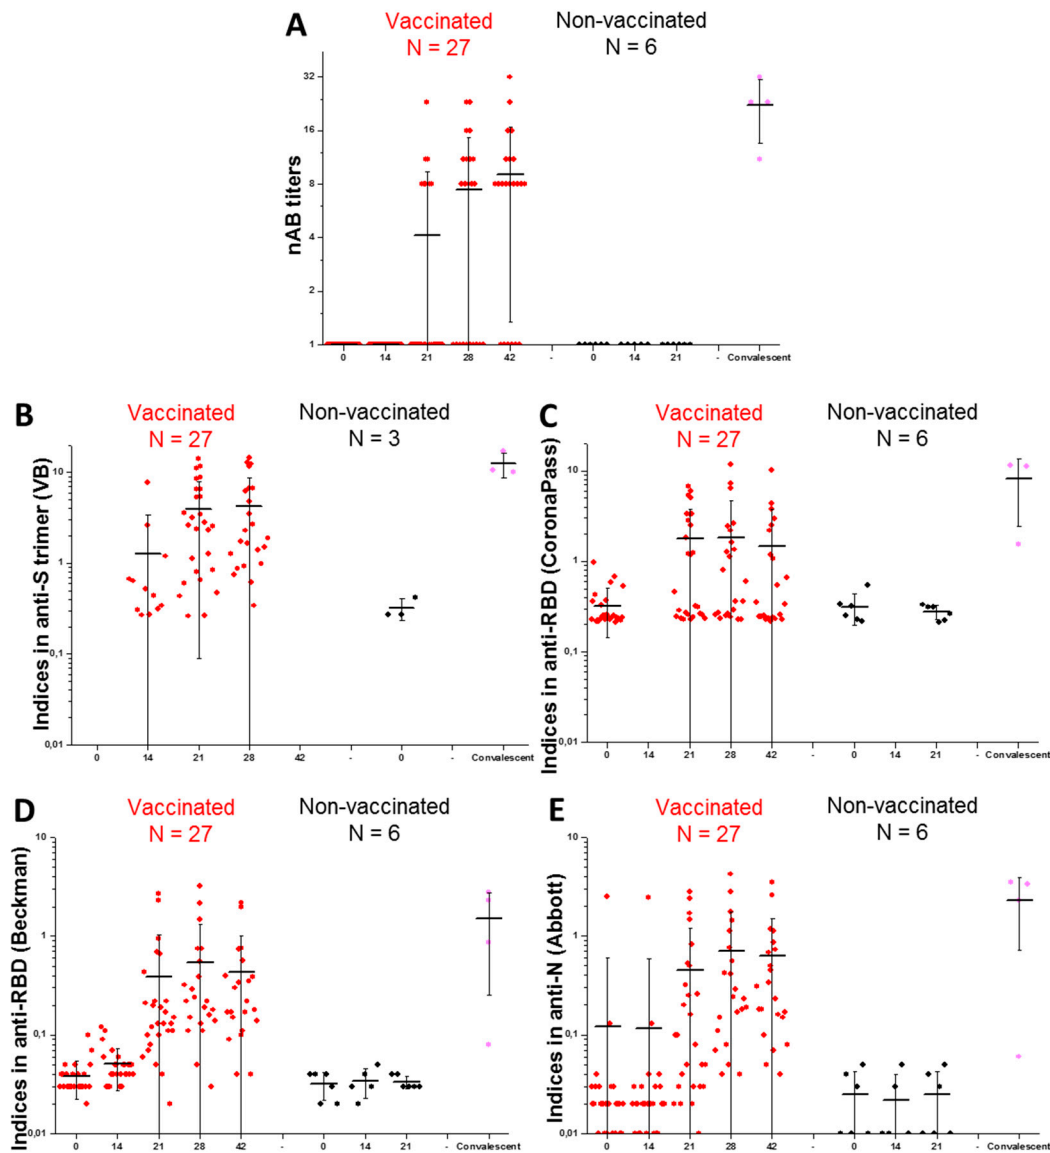

**Supplementary Figure S1.** Anti-SARS-CoV-2 antibody levels following immunization of 27 randomly picked participants who were seronegative at screening. nAB titers in NT (A); and positivity coefficients for ELISA and CMIA kits: anti-S trimer total antibodies ELISA (Vector-Best) (B); anti-RBD total antibodies ELISA (CoronaPass) (C); anti-RBD IgG CMIA (Beckman) (D); and anti-N IgG CMIA (Abbot) (E). Black line – Mean, whiskers – SD. Blue area signifies a positive threshold (grey zone) for each test. Black dots represent the results from sera samples from 6 randomly picked participants from Placebo Group obtained in the same tests in parallel (with Vector-Best sera from 3 participants were tested). Purple dots represent 4 samples of convalescent sera used as positive controls.

In order to assess the sensitivity of commercial CMIA and ELISA tests, serum samples from 27 randomly picked participants from the Vaccine Group in Stage 3 of the 18–60 cohort who were anti-SARS-CoV-2 nAB negative at screening were used to evaluate the correlation between the virus neutralization titers in NT and the positivity coefficients



in binding antibody detection assays. Two abovementioned CMIA tests and two ELISA-based tests detecting total antibodies to S trimer expressed in eukaryotic system and total antibodies to RBD (SARS-CoV-2-AB total-EIA-BEST, Vector-Best, Russia and CoronaPass Total kit, Genetico, Russia, respectively) were used (Supplementary Figure S1).

Both ELISA-based total antibody detection kits showed higher correlation of seropositivity rates and positivity coefficients with the virus neutralization titers in NT than the CMIA tests. The Vector-Best ELISA kit was able to detect total antibodies to S trimer in 3/27 participants at Day 14 after the 1<sup>st</sup> immunization (Supplementary Figure S1B), while virus-neutralizing antibodies in NT (Supplementary Figure S1A) and total antibodies to RBD (Supplementary Figure S1C) were detected only from Day 21.

The analysis of the individual test results showed that in the samples with detectable nAB levels (over 1:8) we could see a significant increase in the positivity coefficients in CMIA kits compared with the samples obtained at screening (Supplementary Figure S1A,D,E), but the levels were below the “grey zone”, indicating insufficient sensitivity of these tests.
